# Manipulation of striatal population dynamics using temperature warps judgment of time

**One Sentence Summary:** Manipulation of striatal population speed by temperature controls the speed of a latent timing process without affecting movement timing.

Tiago Monteiro<sup>1,2,\*</sup>, Filipe S. Rodrigues<sup>1,\*</sup>, Margarida Pexirra<sup>1,3,\*</sup>, Bruno F. Cruz<sup>1</sup>, Ana I. Gonçalves<sup>1</sup>, Pavel E. Rueda-Orozco<sup>4</sup>, Joseph J. Paton<sup>1,†</sup>

<sup>1</sup> Champalimaud Centre for the Unknown, Lisbon, Portugal.

<sup>2</sup> Current address: Department of Zoology, University of Oxford, UK.

<sup>3</sup> Current address: Max Planck Institute for Ornithology, Seewiesen, Germany.

<sup>4</sup> Institute of Neurobiology, UNAM Juriquilla, Mexico.

\* These authors contributed equally to the work

† To whom correspondence should be addressed, [joe.paton@neuro.fchampalimaud.org](mailto:joe.paton@neuro.fchampalimaud.org)

**Abstract:** Time is critical for brain function, yet its neural bases are poorly understood. One prominent hypothesis posits that networks of neurons intrinsically support timing function because time is implicit in the state of neuronal population activity as it evolves along reproducible trajectories in the space of possible firing patterns. We tested this hypothesis in the striatum, an input area of the basal ganglia, by using temperature to manipulate population activity and measuring the behavioral impact on rats performing categorical time judgments. Cooler

23 temperatures caused dilation, and warmer temperatures contraction, of both neural activity and  
24 the pattern of judgments in time. In contrast, temperature did not cause consistent effects on low  
25 level timing of movements. These data demonstrate that the time-course of evolving striatal  
26 population activity dictates the speed of a latent timing process, operating above the lower levels  
27 in a hierarchy of behavioral control.

# INTRODUCTION

Much of behavior is dependent on the ability to estimate the passage of time. Humans and other animals must extract temporal structure from the environment to learn to anticipate events, to understand relationships between actions and consequences, and use estimates of time to plan and properly time action. For tasks as varied as waiting at a stoplight to a hummingbird foraging for nectar, time is fundamental. However, the neural substrates of timekeeping are poorly understood.

Timing mechanisms appear to be distributed across the nervous system, reflecting the importance of time information for much of brain function (1, 2). However, one common requirement among diverse time dependent functions is the need to create an index for time, ordering and spacing information along the temporal dimension such that useful relations can be extracted and outputs appropriately coordinated. On the scale of seconds to minutes at which much of behavior unfolds, neuronal population dynamics represent a candidate means of both encoding and producing temporal patterns. Artificial neural network models have explored evolving population activity as a basis for timing sensory events (3) and timed movements (4). And correlations between behavior and the time-course of neuronal population activity have lent further support to the hypothesis that time-varying patterns of neural activity within a population perform temporal computations (5–8). One critical prediction of these “population clock” hypotheses is that experimental slowing or speeding of population activity should lead to a corresponding dilation or contraction of the temporal functions performed by the population. Here, we test this prediction by using focal temperature manipulations to experimentally speed or slow neuronal population dynamics as rats judge intervals of time.

One brain system where time information appears to be critical is the basal ganglia (BG), an evolutionary ancient set of brain structures thought to contribute to appropriate action selection based on experience. A dominant view holds that the BG embed core features of algorithms similar to those found in computational models of reinforcement learning (RL) (9). In mammals, inputs from a diverse set of territories in cortex, thalamus, and limbic brain structures convey information about the state of the world that converges with dense dopaminergic input in the major input area of the BG, the striatum. The input from dopamine neurons is thought to teach striatal circuits about the value and risks of taking particular actions in a given state, information that can ultimately be conveyed to downstream brainstem and thalamo-cortical motor circuits to bias selection or otherwise specify features of actions. To accomplish such a function, the BG would need access to knowledge about ordering and spacing along the temporal dimension both to extract meaningful relations between the environment, actions and outcomes that drive learning (10, 11), and to coordinate the production of actions in time (12, 13). Interestingly, data from people with BG disorders (14, 15) and human fMRI (16, 17) have consistently identified the BG as being involved in timing behavior. In addition, lesions and pharmacological manipulations of the striatum can cause deficits in temporal estimation and reproduction (18, 19). Lastly, recordings from striatal populations have demonstrated that time information can be readily decoded from neural activity, and this information correlates with variability in timing behavior (7, 20–23). Specifically, the state of striatal population activity continuously changes along reproducible trajectories during behavioral tasks that require time estimation, advancing more quickly when animals produce behavior consistent with longer time estimates, and more slowly when they produce behavior consistent with shorter time estimates (4, 7, 19, 23).

To test whether variability in the speed of BG population dynamics merely correlates with or directly regulates timing judgments, we sought to experimentally manipulate BG population

78 dynamics as animals reported temporal judgments. Interestingly, despite being composed of  
79 elements with differing temperature dependencies (24), neural circuits can produce patterns of  
80 activity that systematically slow down or speed up with decreasing or increasing temperature  
81 within some range around their normal operating point (25, 26). For this reason, temperature  
82 manipulations may be used to test hypotheses regarding the relationship between the speed of  
83 neural dynamics and function. Indeed temperature manipulations in the zebra finch have been  
84 used to identify area HVC as a locus within the song production circuit that contributes to the  
85 temporal patterning of bird song (27). Similar temperature manipulations in humans have  
86 identified a subregion of speech motor cortex that regulates the speed of speech (28), and a  
87 region of rodent medial frontal cortex that controls the timing of a delayed movement (29). Here,  
88 we used a custom thermoelectric cooling (TEC) device to systematically vary the temperature of  
89 striatal tissue, both warming and cooling relative to a baseline condition. We observed  
90 bidirectional and dose-dependent changes in animals' timing judgments, with warmer (cooler)  
91 temperatures leading to relative overestimation (underestimation) of duration. To assess how  
92 temperature manipulations altered neural population activity absent potential behavioral  
93 confounds, we manipulated the temperature of striatal tissue while recording optogenetically  
94 induced population dynamics under anesthesia. We found that temperature caused a bidirectional  
95 and dose-dependent change in the time-course of neural population activity, resulting in  
96 systematic changes in the encoding of temporal information consistent with the observed effects  
97 on behavior. Together, these findings demonstrate that dynamics involving populations of BG  
98 neurons can control the temporal scaling of decision variables that are used to guide judgments  
99 of duration, providing insight into how the BG may extract temporal information from the  
100 environment and use it to coordinate behavior.

# RESULTS

We trained rats to report intervals of time as either shorter or longer than a 1.5-s category boundary (**Fig. 1A, B, C**). Briefly, rats were placed in a rectangular behavioral box with three nose ports positioned at head level along one wall (**Fig. 1A**). Trials began with an auditory tone triggered by the subjects' entry into the central "initiation" nose port. After an interval of silence during which animals were required to maintain their snout positioned in the central port, a brief second tone was delivered. This second tone acted both as stimulus offset, defining the duration of the interval animals were asked to judge, and a "go" cue, freeing animals to report their choice at one of two equidistant ports on either side of the initiation port. Choices reported at one of the lateral noseports following short stimuli ( $<1.5$  s) and at the opposite lateral noseport after long stimuli ( $>1.5$  s) were defined as "correct" and resulted in delivery of a water reward at the choice port. "Incorrect" choices and premature departures from the central port before second tone delivery were punished with an error tone and a time penalty added to the inter-trial-onset interval (**Fig. 1A**). We defined reaction and movement times as the latency to depart from the initiation port after the second tone, and the time between leaving the initiation port and entering a choice port, respectively. The task thus provided a quantitative readout of a timing judgment, quantified as the probability of making a long choice as a function of interval duration, as well as metrics reflecting low-level motor function such as the latency to respond to a go cue, and the speed with which animals moved to report their choices.

Previously, we found that trial to trial variability in the speed of striatal dynamics correlated with variability in rats' timing judgments in this task, with slower dynamics during interval presentation predicting "short judgments", and faster dynamics predicting "long judgments" (23). If these dynamics were capable of directly driving temporal judgments, manipulating their speed

should cause systematic changes in animals' choices. Temperature has been shown in multiple systems to alter the speed of neural population activity while maintaining the general pattern (25, 26). Thus, we experimentally manipulated the temperature of striatal tissue and examined effects on animals' behavior. First, we developed a thermoelectric cooling (TEC) device (30) (**Fig. 1D**) based on the Peltier effect and used it to achieve closed-loop control over the temperature of silver metal probes implanted in brain tissue. To characterize the spatio-temporal profile of temperature changes in the brain, we measured temperature at different distances from the tip of a probe implanted in dorso-central striatum (DCS), setting our TEC device to a control temperature approximating normal body temperature, one warm condition or two levels of cooling (**Fig. 1E**). Throughout all experiments in the study, we applied temperature manipulations using a common block design of control-manipulation-control with transitions occurring at three-minute intervals (**Fig. 1F**). Manipulation temperatures were drawn at random and without replacement from the aforementioned set until its exhaustion, at which point the set was replenished and the sampling process resumed. We found that temperature in the brain tracked block changes, reaching asymptote within ~60 s of transitions, and that temperature changes fell off to minimal levels within 6.0 mm of the probe tip (**Fig. 1E**). This *in vivo* characterization of the implant confirmed that temperature manipulations were localized to striatal tissue and that manipulation blocks of three minute duration would allow for assessing effects of striatal temperature on behavior.

We next chronically implanted six rats previously trained in the interval discrimination task (**Fig. 1B, C**) targeting the probe tips of the TEC device to DCS (**Fig. 1D, Fig. S1**). In advance of temperature manipulations, rats' performance was virtually perfect for easy stimuli, progressively more variable as stimuli approached the categorical boundary and was well described by a sigmoidal psychometric function with a threshold matching the experimentally imposed decision threshold of 1.5 s (**Fig. 1B**). Strikingly, at the onset of temperature manipulations, all six animals

exhibited bidirectional and monotonic changes in their discrimination behavior as a function of temperature: rats were less likely to report long judgments during cooling blocks, and more likely to report long judgments during warm blocks, particularly for intervals nearer to the 1.5-s categorical boundary (**Fig. 2A, B**). Importantly, the larger the magnitude of the cooling manipulation, the larger the change in choice behavior (**Fig 2C**). The systematic changes in the animals judgments caused by temperature was best described by shifts in the *threshold* parameter of the psychometric curve (**top inset Fig. 2A**) - the stimulus duration at which the sigmoid crosses 50% probability of the animal making either a long or short choice (see methods). Thresholds tracked differences between control and manipulation temperatures in both sign and magnitude for all individual animals (**Fig. 2B, C**). These data were consistent with data collected using an earlier version of the implant capable of producing only a single cooling temperature (**inset Fig. 2B, Fig. S2**). Additionally, the circuit mechanism underlying the behavioral effects of temperature did not seem to involve overlying primary motor cortex (M1), through which the insulated portion of the probes passed, because direct manipulation of M1 temperature in an additional set of four rats produced significantly smaller effects on choice behavior (**Fig. 2C, Fig. S3**), consistent with volume conduction of cortical temperature manipulations to the striatum. Thus, striatal temperature manipulations caused highly reproducible, parametric variation in a decision variable used by rats to guide duration judgments during the task.

What can these results tell us about the nature of the specific functions supported by striatal circuits? Animals often develop stereotyped patterns of movement that correlate with behavioral readouts of timing (31–33). Such observations have led to the hypothesis that animals may offload timing function onto motor systems in a form of embodied cognition. Given such hypotheses and the involvement of the BG in movement, we hypothesized that if temperature manipulations in the striatum affected timing judgments, they might similarly impact low level



features of movement. To assess this, we measured animals' time to react to the interval go cue, and the time taken to move to the choice port. Reaction and movement times integrate information about decision uncertainty (34) and temporal expectation of interval offset (35, 36) (**Fig. S4**). Thus, to avoid interference between potential motor and decision-related influences on metrics of movement, we focused our analysis of reaction and movement times on trials where decisions were most consistent across temperatures, and where temporal expectation would be affected as little as possible by variability in a latent timing process. This corresponded to trials in which the shortest interval in the set was presented (**Fig. S4**). In only 1 out of 6 animals, did we observe changes in reaction or movement times that were consistent with the observed change in psychometric threshold across striatal temperatures, and we observed no significant effect of temperature on movement or reaction times across animals (**Fig. 2C, D**). These data suggest that at the level of striatal circuitry, the timing of low level motor processes can be dissociated from the temporal regulation of decision-variables used to guide animals' judgments.

We next wanted to understand the features of neural activity that were modified by temperature to cause the observed biases in timing judgment. Given the previous observation that behavior correlated with the speed of striatal population dynamics (23), we sought a means of assessing the impact of temperature on population dynamics free from the potential confounding influence of ongoing behavior. To achieve this, we adapted a paradigm for optogenetically inducing reliable patterns of striatal population activity under anesthesia (13). Briefly, we expressed Channelrhodopsin-2 (ChR-2) in the ventral posterolateral nucleus (VPL, **Fig. 3A**), a somatosensory thalamic area, using a viral strategy. Three weeks post-infection, under urethane anaesthesia, we implanted an optic fiber over VPL, a single insulated silver probe of our TEC device into DCS and an adjacent Neuropixels (37) silicon probe (**Fig. 3A, Fig. S1**). We then stimulated VPL with 50-ms trains of blue light pulses once every 1.5 s and recorded DCS neural activity (**Fig. 3B**, see methods). Stimulation of VPL thalamus caused a brief volley of

activity, followed shortly thereafter by reproducible patterns of firing across the population over hundreds of milliseconds after the last light pulse had been delivered (**Fig. 3B, C**). For assessing the effect of temperature on neural responses we focused on this longer lasting activity because, unlike the initial volley, later responses reflected ongoing dynamics of the system as opposed to the direct impact of stimulation.

Given the observed effects of temperature on timing judgments reported above, we hypothesized that cooler temperatures dilate, and warmer temperatures contract, neural firing rate profiles in time. Indeed, while the general patterning of firing rate over time was maintained across different temperatures, the time-course of this pattern systematically varied with temperature, advancing more slowly the colder the temperature, and more quickly when temperature was raised above baseline (**Fig. 4A**). To quantify temperature dependent warping in the time-course of neural responses, we computed a scaling factor for each neuron and each of the four temperature conditions. We first created an array of time-warped versions of the average spike density function recorded during a subset of control trials and then measured how well these templates matched the average spike density functions recorded during both the remaining set of control trials and all manipulation blocks by regressing them against each other. The warp factor resulting in the largest coefficient of determination ( $R^2$ ) was chosen as the temporal scaling factor for that neuron-temperature pair (**Fig. S5**, see methods). Scaling as opposed to time shifting of responses provided a significantly better explanation of the effect of temperature on firing rates across the population (**Fig. S5**). For ease of comparison with behavioral effects of temperature, we transformed individual neuron scaling factors to be expressed as the percent dilation caused by each temperature (with negative values corresponding to contraction). Across all recorded neurons, distributions of percent dilation were ordered inversely as a function of temperature (**Fig. 4A, B, C**), with the majority of cells exhibiting time-contracted firing profiles (dilation < 0%) under warming, and time-dilated firing profiles (dilation > 0%) under cooling conditions.

In a previous study, we observed that striatal population activity exhibited trial to trial variability in its time-course that correlated with whether rats judged intervals as longer or shorter than 1.5 s. In addition, estimates of elapsed time decoded from striatal populations predicted timing judgments (23). To assess whether temperature effects recapitulated features of endogenous variability in population activity during behavior and its impact on readout of decision variables, we decoded elapsed time from the population under different temperatures. Briefly, we first characterized the “typical” temporal profiles of striatal responses using a subset of control trials, and then applied a probabilistic decoding approach to estimate the most probable value of current elapsed time based only on the observed state of the recorded population for all time points in all remaining trials. Estimates of elapsed time derived from ongoing population activity systematically led ahead and lagged behind true time during warming and cooling blocks, respectively. This can be observed by sampling the output of our decoder of elapsed time at discrete delays from stimulation onset (**Fig. 4D**), and more continuously by subtracting decoder output based on activity recorded during control blocks from that based on activity recorded during the three different manipulation conditions (**Fig. 4E**). Relative to control, cooler temperatures gradually shifted decoded estimates of time earlier, and the warmer temperature shifted decoded estimates of time later. These data demonstrate that the temporal scaling of neural response profiles by temperature recapitulated features of endogenous variability in the time-course of population activity and time encoding in a manner previously shown to correlate with timing judgments. We thus conclude that the systematic changes in timing judgments induced by temperature manipulations of the striatum we describe here are most likely explained by the effect of temperature on the temporal scaling of neuronal responses within populations of neurons.

Previous work has demonstrated that neural population activity tends to traverse reproducible trajectories in the space of possible firing patterns, and that the speed with which activity traces this trajectory can correlate with variability in the timing of actions (4, 38–40) and in

time-dependent decisions (6, 23, 41). Here we show that experimental temperature manipulations in the striatum, an area where population speed along a trajectory has been shown to correlate with timing judgments, similarly rescales both striatal neural population responses and latent decision variables that rats use to guide judgments of duration. However, we did not observe consistent effects of temperature on the speed of or latency to initiate movements, suggesting that striatal population trajectories are not necessarily involved in the timing of low-level aspects of movement. It has long been appreciated in fields as diverse as neuroscience, robotics, and artificial intelligence that control of movement is likely facilitated by a hierarchy of control mechanisms (42, 43). Our observation that manipulating striatal population speed differentially impacts evolution of decision variables and those required for the timing of movement is consistent with the proposal that the BG act as a mid-level controller of movement, important for selecting among (9), linking (12), or modulating (44) different actions but not involved in the details of their execution. This finding is reminiscent of the observation that cooling an orofacial region of motor cortex in singing mice slows certain aspects of the song while leaving others unchanged (45). Interestingly, tonic inhibition of the direct feedforward pathway of the BG at its initiation point in the striatum can produce a slowing of movement (46, 47), suggesting that the influence of the BG on control of parameters such as movement speed is not through dynamics in the higher dimensional space of population firing, but rather through a low dimensional, even scalar, modulation of motor programs that are largely implemented by circuitry elsewhere.

Interestingly, while the effects of temperature on timing judgments were robust in the first sessions of manipulations (**Fig. 2**), these effects diminished with experience (**Fig. S6**). Though we had sought to minimize opportunities for animals to learn to adapt to the temperature manipulations by applying manipulations in blocks of trials lasting only three minutes, always interspersed with a control temperature block (**Fig. 1F**), and alternating manipulation sessions with “washout” sessions where temperature was not manipulated (**Fig. 1C**), we wondered whether

animals might have learned to adapt to the effects of our temperature manipulations. To assess this possibility, we performed a set of behavioral experiments in which the boundary between intervals rewarded for short judgments, and those rewarded for long judgments was shifted in the same blockwise manner as was temperature during the previously described experiments (**Fig. S6**). This manipulation was devised to create a similar scenario to that created by striatal temperature manipulations in terms of unsignaled and surprising feedback that could be used by the animal to adapt their decision-making strategy to maximize rewards. Indeed, animals developed the ability to shift their decision thresholds over a small number of sessions (**Fig. S6**), similarly to the observed diminishing effects of temperature on temporal judgments. Thus, while temperature manipulations might also produce physiological adaptations that render neural systems more robust to future temperature variations (24), we found that the changing impact of temperature on timing judgments was consistent with learning to compensate for decision variables whose features might be changing. These data suggest that in general the behavioral impact of manipulating neural systems should be evaluated continuously from the moment the manipulations begin, as opposed to evaluating end-point effects alone, as the adaptation ability of animals may be capable of overcoming what are initially significant effects on performance (48).

What circuit mechanisms might give rise to task-relevant population activity in the striatum during our experiments? In songbirds, there is evidence that a combination of local circuit mechanisms in pallial area HVC and a larger re-entrant circuit involving HVC and multiple other brain areas are involved in generating the temporally patterned activity underlying song timing (26, 27). As in the vocal control circuit of songbirds, our data appear to be inconsistent with a mechanism where the relevant dynamics are simply inherited by the brain area targeted for temperature manipulations, in our case the dorsal striatum. Under such a scenario, cooling would be expected to simply induce a slight, additive delay of the pattern observed in that area, and not

its rescaling. Alternatively, activity patterns could be produced by local connectivity within the striatum. While most network modelling efforts that use neural dynamics for computation have relied at least in part on recurrent excitation, recent work suggests that it may be possible for a largely inhibitory, striatum-like circuit to produce complex spatio-temporal dynamics given sustained excitatory input (49). A third possibility is that the striatum may represent one stage in a larger re-entrant circuit involving multiple brain systems, and it is that larger circuit that is ultimately responsible for generating dynamic patterns of activity that govern the evolution of decision-variables. In this view, delays or advances induced by cooling or warming would accumulate with each cycle through the re-entrant circuit, resulting in temporal rescaling with temperature. Such a circuit could in principle involve cortex, BG structures and thalamus (50), or subcortical areas such as downstream BG structures, superior colliculus and thalamus (51). Our data suggest that any re-entrant circuit mechanism involving cortex does not include motor cortex as temperature manipulations there had minimal effects on choice behavior, consistent with previous studies demonstrating that manipulating motor cortex does not affect well learned behavior in motor timing tasks (29, 32). However, orbito-frontal and medial frontal cortical areas have been shown to encode temporal information during both motor timing and temporal judgment tasks, albeit less accurately than in striatum (6, 7), and cooling of medial frontal cortical structures has been shown to slow timed movements (29), suggesting potential involvement of frontal cortical structures. In addition, the activity of midbrain dopamine neurons correlates with and can directly cause changes in timing judgments (52), suggesting that dopaminergic neuromodulation may act to tune the time-course of network activity through its action on striatal neurons.

Almost a century ago, observations that core body temperature could influence time reproduction and estimation led to the hypothesis that timing was mediated by a “chemical clock” (53, 54). The thinking was that heating or cooling the chemical reactions composing the clock

would speed or slow them respectively, leading to a faster or more sluggish timekeeping. These ideas later gave way to information processing views of timekeeping mechanisms that involved a central pacemaker that emits pulses that are accumulated by a counter to estimate passage of time and stored in memory for later use (55, 56). More recently, it has been proposed that timing processes are more distributed in the brain, and that networks of neurons possess a rich capacity to act as timekeeping mechanisms through the time-varying patterns of activity they tend to produce, sometimes termed a “population clock”. While the data presented here would seem most closely related to this latter hypothesis, in principle the kinds of computations performed by earlier more algorithmic information processing accounts of timing might well be embedded in the activity of and interactions between populations of neurons. This possibility is reflected in a recent suggestion that the brain performs many computations through dynamics (57).

“Train of thought”, “stream of consciousness”, and “course of action” are all phrases that reference the fundamentally dynamic nature of cognition and behavior. Our percepts, thoughts, and actions are continuously intertwined and regulated in time, and indeed understanding the neural basis of timing has been argued to be a necessary prerequisite for general models of cognition (58). Yet understanding how the brain appropriately orders and spaces information along the temporal dimension has been an enduring challenge for neuroscience. Here we demonstrate that the time-course of activity in populations of striatal neurons directly determines the time-course of a latent timing process used to guide decision-making. Understanding the precise circuit mechanisms responsible for establishing and modulating the timescale of neural activity in these circuits, and which specific computations this activity subserves, represent important future directions of inquiry if we are to understand how the brain goes beyond what the immediate environment presents to it, drawing on internally computed information to produce adaptive and intelligent behavior.

# REFERENCES AND NOTES

1. J. T. Coull, R.-K. Cheng, W. H. Meck, Neuroanatomical and neurochemical substrates of timing. *Neuropsychopharmacology*. **36**, 3–25 (2011).
2. J. J. Paton, D. V. Buonomano, The Neural Basis of Timing: Distributed Mechanisms for Diverse Functions. *Neuron*. **98**, 687–705 (2018).
3. D. V. Buonomano, M. M. Merzenich, Temporal information transformed into a spatial code by a neural network with realistic properties. *Science*. **267**, 1028–1030 (1995).
4. J. Wang, D. Narain, E. A. Hosseini, M. Jazayeri, Flexible timing by temporal scaling of cortical responses. *Nat. Neurosci.* (2017), doi:10.1038/s41593-017-0028-6.
5. H. Merchant, B. B. Averbeck, The Computational and Neural Basis of Rhythmic Timing in Medial Premotor Cortex. *J. Neurosci.* **37**, 4552–4564 (2017).
6. J. Kim, J.-W. Ghim, J. H. Lee, M. W. Jung, Neural correlates of interval timing in rodent prefrontal cortex. *J. Neurosci.* **33**, 13834–13847 (2013).
7. K. I. Bakhurin, V. Goudar, J. L. Shobe, L. D. Claar, D. V. Buonomano, S. C. Masmanidis, Differential Encoding of Time by Prefrontal and Striatal Network Dynamics. *J. Neurosci.* **37**, 854–870 (2017).
8. M. Jazayeri, M. N. Shadlen, A Neural Mechanism for Sensing and Reproducing a Time Interval. *Curr. Biol.* **25**, 2599–2609 (2015).
9. K. Doya, What are the computations of the cerebellum, the basal ganglia and the cerebral cortex? *Neural Netw.* **12**, 961–974 (1999).



10. C. R. Gallistel, J. Gibbon, Time, rate, and conditioning. *Psychol. Rev.* **107**, 289–344 (2000).
11. N. D. Daw, A. C. Courville, D. S. Touretzky, Representation and timing in theories of the dopamine system. *Neural Comput.* **18**, 1637–1677 (2006).
12. A. M. Graybiel, The basal ganglia and chunking of action repertoires. *Neurobiol. Learn. Mem.* **70**, 119–136 (1998).
13. A. E. Hidalgo-Balbuena, A. Y. Luma, A. K. Pimentel-Farfan, T. Peña-Rangel, P. E. Rueda-Orozco, Sensory representations in the striatum provide a temporal reference for learning and executing motor habits. *Nat. Commun.* **10**, 1–15 (2019).
14. C. Malapani, B. Rakitin, R. Levy, W. H. Meck, B. Deweer, B. Dubois, J. Gibbon, Coupled temporal memories in Parkinson's disease: a dopamine-related dysfunction. *J. Cogn. Neurosci.* **10**, 316–331 (1998).
15. J. S. Freeman, F. W. Cody, D. J. O'Boyle, D. Craufurd, D. Neary, J. S. Snowden, Abnormalities of motor timing in Huntington's disease. *Parkinsonism Relat. Disord.* **2**, 81–93 (1996).
16. J. T. Coull, F. Vidal, B. Nazarian, F. Macar, Functional anatomy of the attentional modulation of time estimation. *Science.* **303**, 1506–1508 (2004).
17. S. M. Rao, A. R. Mayer, D. L. Harrington, The evolution of brain activation during temporal processing. *Nat. Neurosci.* **4**, 317–323 (2001).
18. W. H. Meck, Neuroanatomical localization of an internal clock: a functional link between mesolimbic, nigrostriatal, and mesocortical dopaminergic systems. *Brain Res.* **1109**, 93–107 (2006).
19. G. B. M. Mello, S. Soares, J. J. Paton, A scalable population code for time in the striatum.

*Curr. Biol.* **25**, 1113–1122 (2015).

20. D. Z. Jin, N. Fujii, A. M. Graybiel, Neural representation of time in cortico-basal ganglia circuits. *Proc. Natl. Acad. Sci. U. S. A.* **106**, 19156–19161 (2009).

21. M. S. Matell, W. H. Meck, M. A. L. Nicolelis, Interval timing and the encoding of signal duration by ensembles of cortical and striatal neurons. *Behav. Neurosci.* **117**, 760–773 (2003).

22. J. Kim, D. Kim, M. W. Jung, Distinct Dynamics of Striatal and Prefrontal Neural Activity During Temporal Discrimination. *Front. Integr. Neurosci.* **12**, 34 (2018).

23. T. S. Gouvêa, T. Monteiro, A. Motiwala, S. Soares, C. Machens, J. J. Paton, Striatal dynamics explain duration judgments. *Elife.* **4** (2015), doi:10.7554/eLife.11386.

24. R. M. Robertson, T. G. A. Money, Temperature and neuronal circuit function: compensation, tuning and tolerance. *Curr. Opin. Neurobiol.* **22**, 724–734 (2012).

25. L. S. Tang, M. L. Goeritz, J. S. Caplan, A. L. Taylor, M. Fisek, E. Marder, Precise Temperature Compensation of Phase in a Rhythmic Motor Pattern. *PLoS Biology.* **8** (2010), p. e1000469.

26. K. Hamaguchi, M. Tanaka, R. Mooney, A Distributed Recurrent Network Contributes to Temporally Precise Vocalizations. *Neuron.* **91**, 680–693 (2016).

27. M. A. Long, M. S. Fee, Using temperature to analyse temporal dynamics in the songbird motor pathway. *Nature.* **456**, 189–194 (2008).

28. M. A. Long, K. A. Katlowitz, M. A. Svirsky, R. C. Clary, T. M. Byun, N. Majaj, H. Oya, M. A. Howard 3rd, J. D. W. Greenlee, Functional Segregation of Cortical Regions Underlying Speech Timing and Articulation. *Neuron.* **89**, 1187–1193 (2016).

29. M. Xu, S.-Y. Zhang, Y. Dan, M.-M. Poo, Representation of interval timing by temporally scalable firing patterns in rat prefrontal cortex. *Proc. Natl. Acad. Sci. U. S. A.* **111**, 480–485 (2014).
30. D. Aronov, M. S. Fee, Analyzing the dynamics of brain circuits with temperature: design and implementation of a miniature thermoelectric device. *J. Neurosci. Methods.* **197**, 32–47 (2011).
31. T. S. Gouvêa, T. Monteiro, S. Soares, B. V. Atallah, J. J. Paton, Ongoing behavior predicts perceptual report of interval duration. *Front. Neurobot.* **8**, 10 (2014).
32. R. Kawai, T. Markman, R. Poddar, R. Ko, A. L. Fantana, A. K. Dhawale, A. R. Kampff, B. P. Ölveczky, Motor cortex is required for learning but not for executing a motor skill. *Neuron.* **86**, 800–812 (2015).
33. M. Safaie, M.-T. Jurado-Parras, S. Sarno, J. Louis, C. Karoutchi, L. F. Petit, M. O. Pasquet, C. Eloy, D. Robbe, Turning the body into a clock: Accurate timing is facilitated by simple stereotyped interactions with the environment. *Proceedings of the National Academy of Sciences.* **117**, 13084–13093 (2020).
34. A. Kepecs, N. Uchida, H. A. Zariwala, Z. F. Mainen, Neural correlates, computation and behavioural impact of decision confidence. *Nature.* **455**, 227–231 (2008).
35. B. Pasquereau, R. S. Turner, Dopamine neurons encode errors in predicting movement trigger occurrence. *J. Neurophysiol.* **113**, 1110–1123 (2015).
36. A. Motiwala, S. Soares, B. V. Atallah, J. J. Paton, C. K. Machens, Dopamine responses reveal efficient coding of cognitive variables (2020), p. 2020.05.20.100065.
37. J. J. Jun, N. A. Steinmetz, J. H. Siegle, D. J. Denman, M. Bauza, B. Barbarits, A. K. Lee, C.

- A. Anastassiou, A. Andrei, Ç. Aydın, M. Barbic, T. J. Blanche, V. Bonin, J. Couto, B. Dutta, S. L. Gratiy, D. A. Gutnisky, M. Häusser, B. Karsh, P. Ledochowitsch, C. M. Lopez, C. Mitelut, S. Musa, M. Okun, M. Pachitariu, J. Putzeys, P. D. Rich, C. Rossant, W.-L. Sun, K. Svoboda, M. Carandini, K. D. Harris, C. Koch, J. O'Keefe, T. D. Harris, Fully integrated silicon probes for high-density recording of neural activity. *Nature*. **551**, 232–236 (2017).
38. M. Murakami, M. I. Vicente, G. M. Costa, Z. F. Mainen, Neural antecedents of self-initiated actions in secondary motor cortex. *Nat. Neurosci.* **17**, 1574–1582 (2014).
39. D. A. Crowe, W. Zarco, R. Bartolo, H. Merchant, Dynamic representation of the temporal and sequential structure of rhythmic movements in the primate medial premotor cortex. *J. Neurosci.* **34**, 11972–11983 (2014).
40. E. D. Remington, D. Narain, E. A. Hosseini, M. Jazayeri, Flexible Sensorimotor Computations through Rapid Reconfiguration of Cortical Dynamics. *Neuron*. **98**, 1005–1019.e5 (2018).
41. M. I. Leon, M. N. Shadlen, Representation of time by neurons in the posterior parietal cortex of the macaque. *Neuron*. **38**, 317–327 (2003).
42. J. Merel, M. Botvinick, G. Wayne, Hierarchical motor control in mammals and machines. *Nat. Commun.* **10**, 5489 (2019).
43. J. W. Krakauer, A. M. Hadjiosif, J. Xu, A. L. Wong, A. M. Haith, Motor Learning. *Compr. Physiol.* **9**, 613–663 (2019).
44. J. Park, L. T. Coddington, J. T. Dudman, Basal Ganglia Circuits for Action Specification. *Annu. Rev. Neurosci.* **43** (2020) (available at <https://www.annualreviews.org/doi/abs/10.1146/annurev-neuro-070918-050452>).

45. D. E. Okobi Jr, A. Banerjee, A. M. M. Matheson, S. M. Phelps, M. A. Long, Motor cortical control of vocal interaction in neotropical singing mice. *Science*. **363**, 983–988 (2019).
46. B. Panigrahi, K. A. Martin, Y. Li, A. R. Graves, A. Vollmer, L. Olson, B. D. Mensh, A. Y. Karpova, J. T. Dudman, Dopamine Is Required for the Neural Representation and Control of Movement Vigor. *Cell*. **162**, 1418–1430 (2015).
47. B. F. Cruz, S. Soares, J. J. Paton, Dorsolateral striatal circuits support broadly opponent aspects of action suppression and production (2020), p. 2020.06.30.180539.
48. C. R. Fetsch, N. N. Odean, D. Jeurissen, Y. El-Shamayleh, G. D. Horwitz, M. N. Shadlen, Focal optogenetic suppression in macaque area MT biases direction discrimination and decision confidence, but only transiently. *Elife*. **7** (2018), doi:10.7554/eLife.36523.
49. J. M. Murray, G. S. Escola, Learning multiple variable-speed sequences in striatum via cortical tutoring. *Elife*. **6** (2017), doi:10.7554/eLife.26084.
50. G. E. Alexander, M. D. Crutcher, M. R. DeLong, Basal ganglia-thalamocortical circuits: parallel substrates for motor, oculomotor, “prefrontal” and “limbic” functions. *Prog. Brain Res.* **85**, 119–146 (1990).
51. J. G. McHaffie, T. R. Stanford, B. E. Stein, V. Coizet, P. Redgrave, Subcortical loops through the basal ganglia. *Trends Neurosci.* **28**, 401–407 (2005).
52. S. Soares, B. V. Atallah, J. J. Paton, Midbrain dopamine neurons control judgment of time. *Science*. **354**, 1273–1277 (2016).
53. M. François, VI. Contribution à l’étude du sens du Temps. La température interne comme facteur de variation de l’appréciation subjective des durées. *L’Année psychologique*. **28**, 186–204 (1927).

54. H. Hoagland, The Physiological Control of Judgments of Duration: Evidence for a Chemical Clock. *J. Gen. Psychol.* **9**, 267–287 (1933).
55. M. Treisman, Temporal discrimination and the indifference interval: Implications for a model of the “ internal clock.” *Psychological Monographs: General and Applied.* **77**, 1 (1963).
56. J. Gibbon, Scalar expectancy theory and Weber’s law in animal timing. *Psychol. Rev.* **84**, 279 (1977).
57. S. Vyas, M. D. Golub, D. Sussillo, K. V. Shenoy, Computation Through Neural Population Dynamics. *Annu. Rev. Neurosci.* **43**, 249–275 (2020).
58. G. T. Finnerty, M. N. Shadlen, M. Jazayeri, A. C. Nobre, D. V. Buonomano, Time in Cortical Circuits. *J. Neurosci.* **35**, 13912–13916 (2015).
59. G. Paxinos, C. Watson, *The Rat Brain in Stereotaxic Coordinates: Hard Cover Edition* (Academic Press, 2013).

# ACKNOWLEDGEMENTS

**Acknowledgments:** We thank Bassam Atallah for comments on versions of the manuscript and the entire Paton lab, past and present, for feedback during the course of this project. We would also like to thank the ABBE Facility and the Scientific Hardware, Histopathology and Rodent Champalimaud Research Platforms for unparalleled technical assistance. We thank Francisca Fernandes and Daniel Nunes for acquiring the MRI scans and Mauricio Toro and Renato Sousa for help with animal training. This work was developed with the support from the research infrastructure Congento, co-financed by Lisboa Regional Operational Programme (Lisboa2020), under the PORTUGAL 2020 Partnership Agreement, through the European Regional Development Fund (ERDF) and Fundação para a Ciência e Tecnologia (FCT, Portugal) under the project LISBOA-01-0145-FEDER-022170. **Funding:** The work was funded by an HHMI International Research Scholar Award to JJP (#55008745), a European Research Council Consolidator grant (#DYCOCIRC - REP-772339-1) to JJP, a Bial bursary for scientific research to JJP (#193/2016), internal support from the Champalimaud Foundation, and PhD fellowships from FCT to FR (SFRH/BD/130037/2017), BFC (PD/BD/105945/2014) and AIG (PD/BD/128291/2017). **Author contributions:** TM, FSR, MP, JJP devised the experiments, TM, FSR, MP performed all experiments, analyzed the data and drafted and edited the manuscript. BFC helped design and perform electrophysiology experiments and reviewed the manuscript. AIG performed a subset of temperature manipulation experiments during behavior and reviewed the manuscript. PERO devised and assisted in implementing the method of optogenetically stimulating reproducible striatal dynamics and reviewed the manuscript. JJP supervised all aspects of the project and drafted and edited the manuscript. **Competing interests:** The authors declare no competing financial interests. **Data and materials availability:** The data and analysis

522 code that support the findings of this study are available from the corresponding author upon  
523 reasonable request.

524

525

## 526 LIST OF SUPPLEMENTARY MATERIALS

527 Materials and Methods

528

529 Figures S1 - S6

530

531 References (60 – 62)



# FIGURES

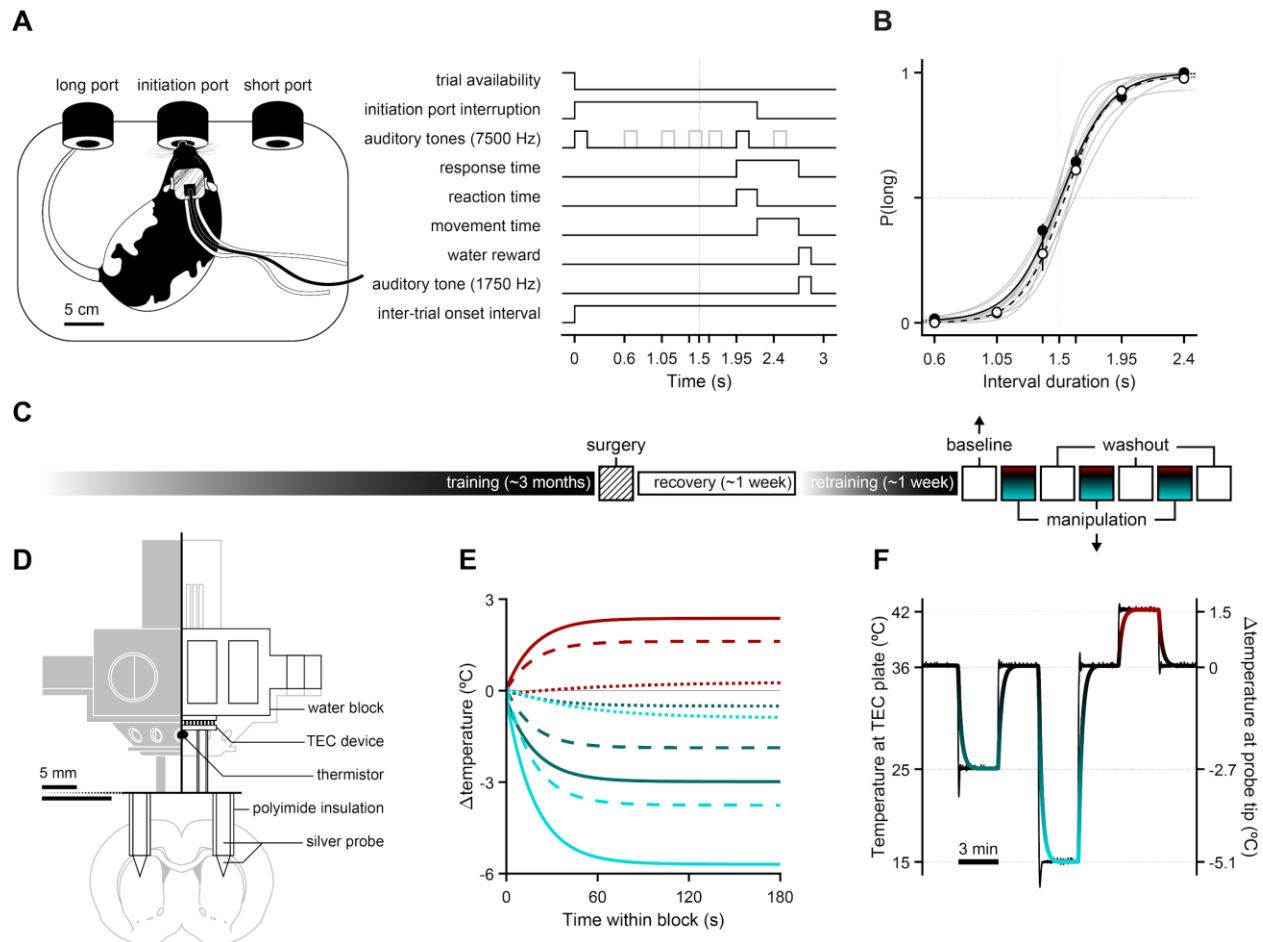

**Figure 1. Rats were trained to report judgments of duration and fitted with a thermoelectric device that enabled temporally and spatially restricted manipulations of brain temperature during behavior.**

(A) Depiction of temperature manipulation setup preparation (left) and event diagram highlighting a correct trial in the interval discrimination task (right). (B) Discrimination performance of all animals implanted with the TEC device (n = 10) on the last day of training before the first

temperature manipulation session. Gray lines are psychometric fits to individual animals. Solid and dashed black lines are fits to averages across animals within cohorts in which we targeted our TEC probes to striatum ( $n = 6$ ) or M1 ( $n = 4$ ), respectively. Black markers correspond to striatal and white markers to cortical targeted implants' data across the cohort (mean  $\pm$  s.e.m.). The thin dotted vertical (horizontal) line represents the categorical boundary (chance-level performance).

**(C)** Timeline for a typical experimental rat. Elongated bars illustrate long periods of time, whereas large squares represent individual daily sessions. **(D)** Schematic of the final version of our implantable TEC device. The thick horizontal black line splits the diagram into two differently scaled subregions (see 5 mm scale bars). Its vertical counterpart further splits the top region into a front view (to its left, with white strokes and gray fills) and a sectional view of a cut plane going through the center of the implant (coronal brain slice adapted from (59)). **(E)** Spatiotemporal profile of the magnitude of our temperature manipulation, modeled using multiple temperature measurements from an acute preparation (see methods). Curves represent differences in temperature between control and manipulation doses as a function of time at different distances from the probe tip, and for different temperature conditions. Color indicates temperature condition (crimson: warm, teal: cold, cyan: coldest) and linestyle indicates distance from probe tip (solid: 0  $\mu\text{m}$ , dashed: 600  $\mu\text{m}$ , dotted: 6000  $\mu\text{m}$ ). The color scheme introduced here is conserved in all following panels and figures. **(F)** Representative segment of a session's thermistor (the one at the lower plate of the TEC device shown in (D)) readout (in black), illustrating the temperature manipulation protocol throughout all experiments. We convolved this TEC temperature trace with an exponential kernel and linearly transformed the result using the model shown in (E) to get an estimate of the corresponding induced temperature changes in tissue surrounding the tips of our implant (gradient-colored trace).

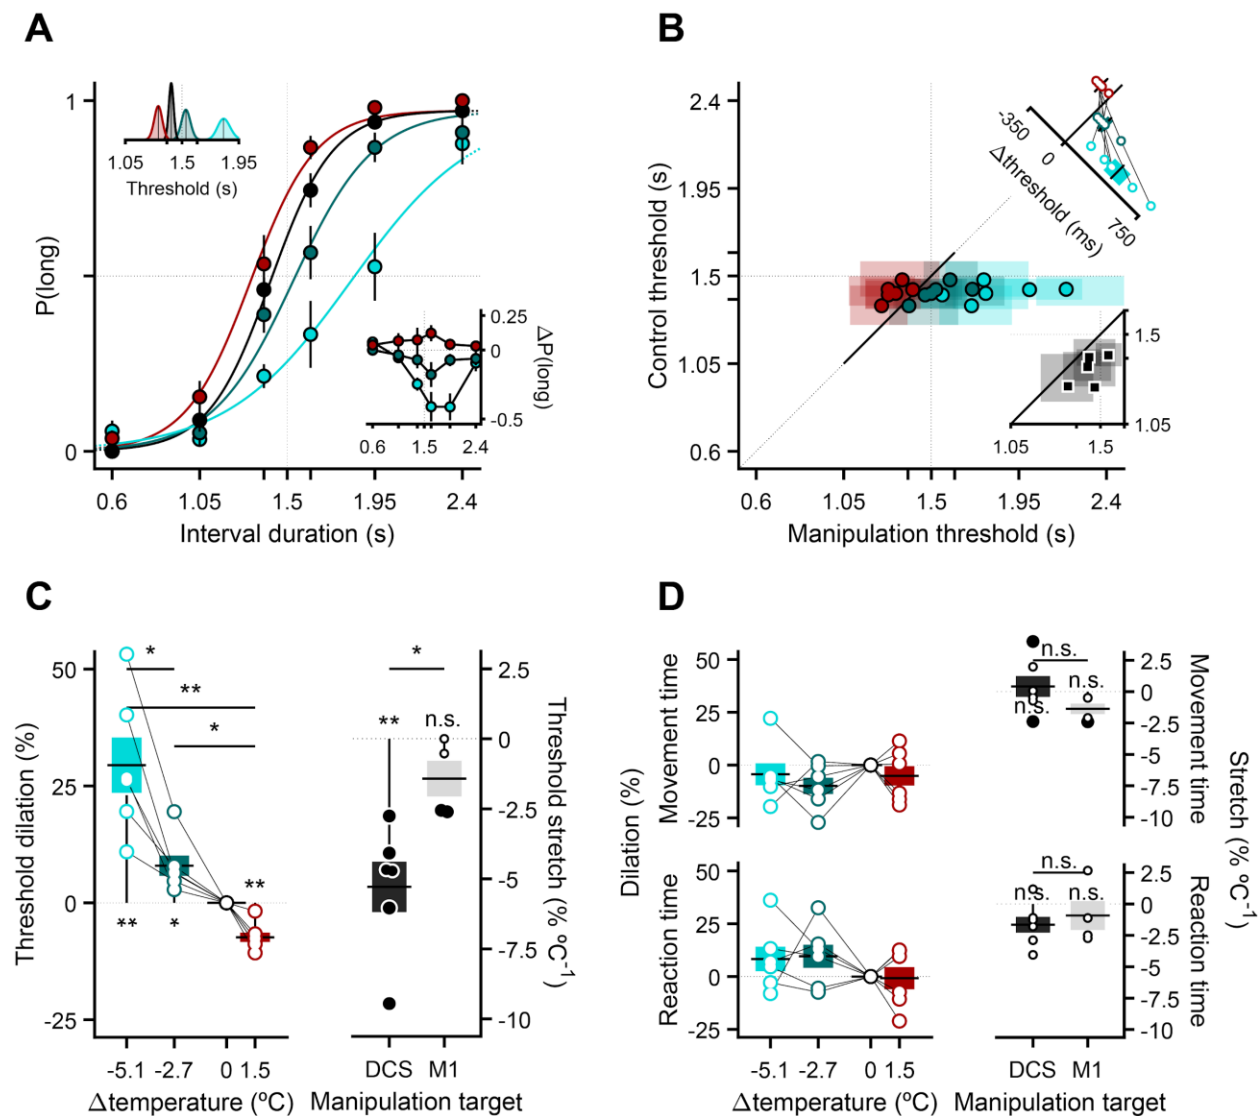

**Figure 2. Manipulating striatal temperature caused bidirectional and dose-dependent changes in duration judgments**

(A) Average discrimination performance at the onset of striatal temperature manipulations. Main axes: psychometric functions fit to cross-animal averages ( $n = 6$ ) of temperature-split psychophysical data, respectively shown as solid lines and markers of matching color (mean  $\pm$  s.e.m.). The thin dotted vertical (horizontal) line represents the categorical boundary (chance-level performance). Bottom-right inset: Average differences in proportion of long choices from

each manipulation condition to control (mean  $\pm$  propagated s.e.m.). The thin dotted vertical (horizontal) line represents the categorical boundary (zero-level). Top-left inset: Marginal posterior distributions of the threshold parameter for each condition's psychometric fit. Solid black lines represent the maximum a posteriori (M.A.P.) point estimates implicit in the fits shown in the main axes. The thin dotted vertical line represents the categorical boundary. **(B)** Main axes: Markers represent M.A.P. estimates and transparent patches the corresponding 95% confidence intervals of threshold parameters fit to individual animals' performance on control (y axis) versus manipulation blocks (x axis). Single animals contribute one data point of each color. The thin dotted vertical and horizontal lines represent the categorical boundary. The identity line is plotted as a diagonal line. Its thick solid portion highlights the region of the main axes that is shown in the bottom-right inset axes. Top-right inset: Distribution of threshold differences between manipulation and control conditions. Markers represent individual animal differences, bars and error bars are animal means and s.e.m. Bottom-right inset: Same as main axes, but with data from a pilot experiment in which we used a single cooling dose (n=5). **(C)** Overall effect of striatal (n = 6) and motor cortical (n=4) temperature manipulations on psychophysical threshold. Left: Distributions of percentage change in threshold relative to control (dilation) as a function of induced temperature changes, shown only for the striatal cohort. Markers represent individual threshold dilations, linked within animals by thin solid black lines. Right: Distributions of the slope coefficients of linear models (stretch) where effects on psychophysical threshold dilation in DCS and M1 cohorts were predicted using estimates of manipulation magnitude at the tips of our implant's probes. Markers represent individual animals, and their size and color denote bootstrapped significance: larger dark-filled markers were significantly different from slopes estimated using equal-sized samples drawn with replacement from the control distribution; this was not true for smaller white-filled markers. **(D)** Same as (C), but for condition-split reaction and movement time medians instead of threshold point estimates. Boxplots show animal means (horizontal thick black lines) and s.e.m. (colored bars).

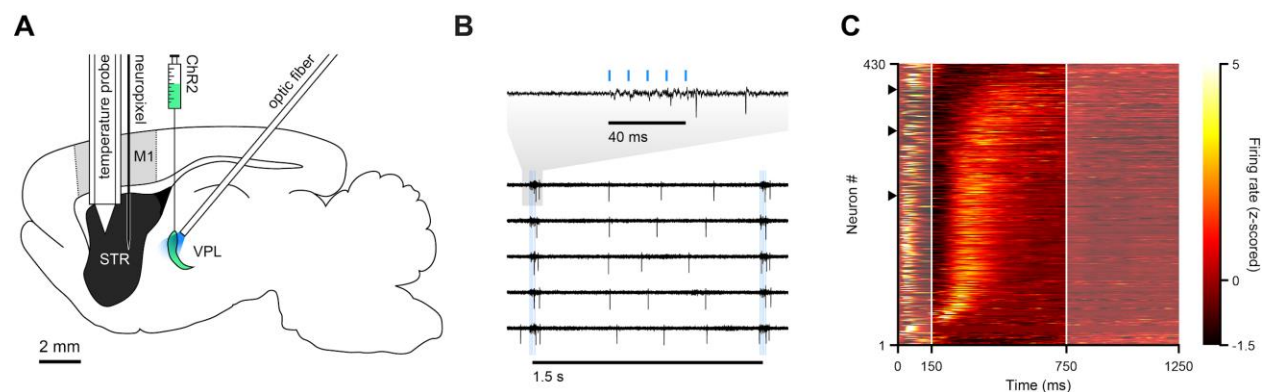

**Figure 3. Optogenetic activation of sensory thalamus elicited reproducible striatal dynamics.**

(A) Schematic of the acute preparation used to elicit, record and manipulate reproducible striatal dynamics in the absence of potential behavioral confounds (sagittal brain slice adapted from (59)). (B) VPL stimulation protocol overlaid with five single-trial examples of evoked striatal voltage signals recorded in the control temperature condition. Black traces are extracellular voltage traces from an arbitrary channel in the striatal portion of our recording probe (i.e., recording depth > 1 mm from cortex surface, **Fig. S1**). Blue ticks depict light pulses. (C) Normalized and smoothed peri-stimulus time histograms (PSTHs) of all putative striatal neurons (n = 430), built using half of all trials that were recorded in the control condition. Units are ordered by their maximum firing rates between 150 ms and 750 ms from stimulation onset, calculated using the remaining half of control trials. This time window is delimited by white vertical lines and adjacent transparent patches, and was the region of interest in all subsequent population analyses. Arrowheads indicate example neuronal units shown in **Fig. 4A**.

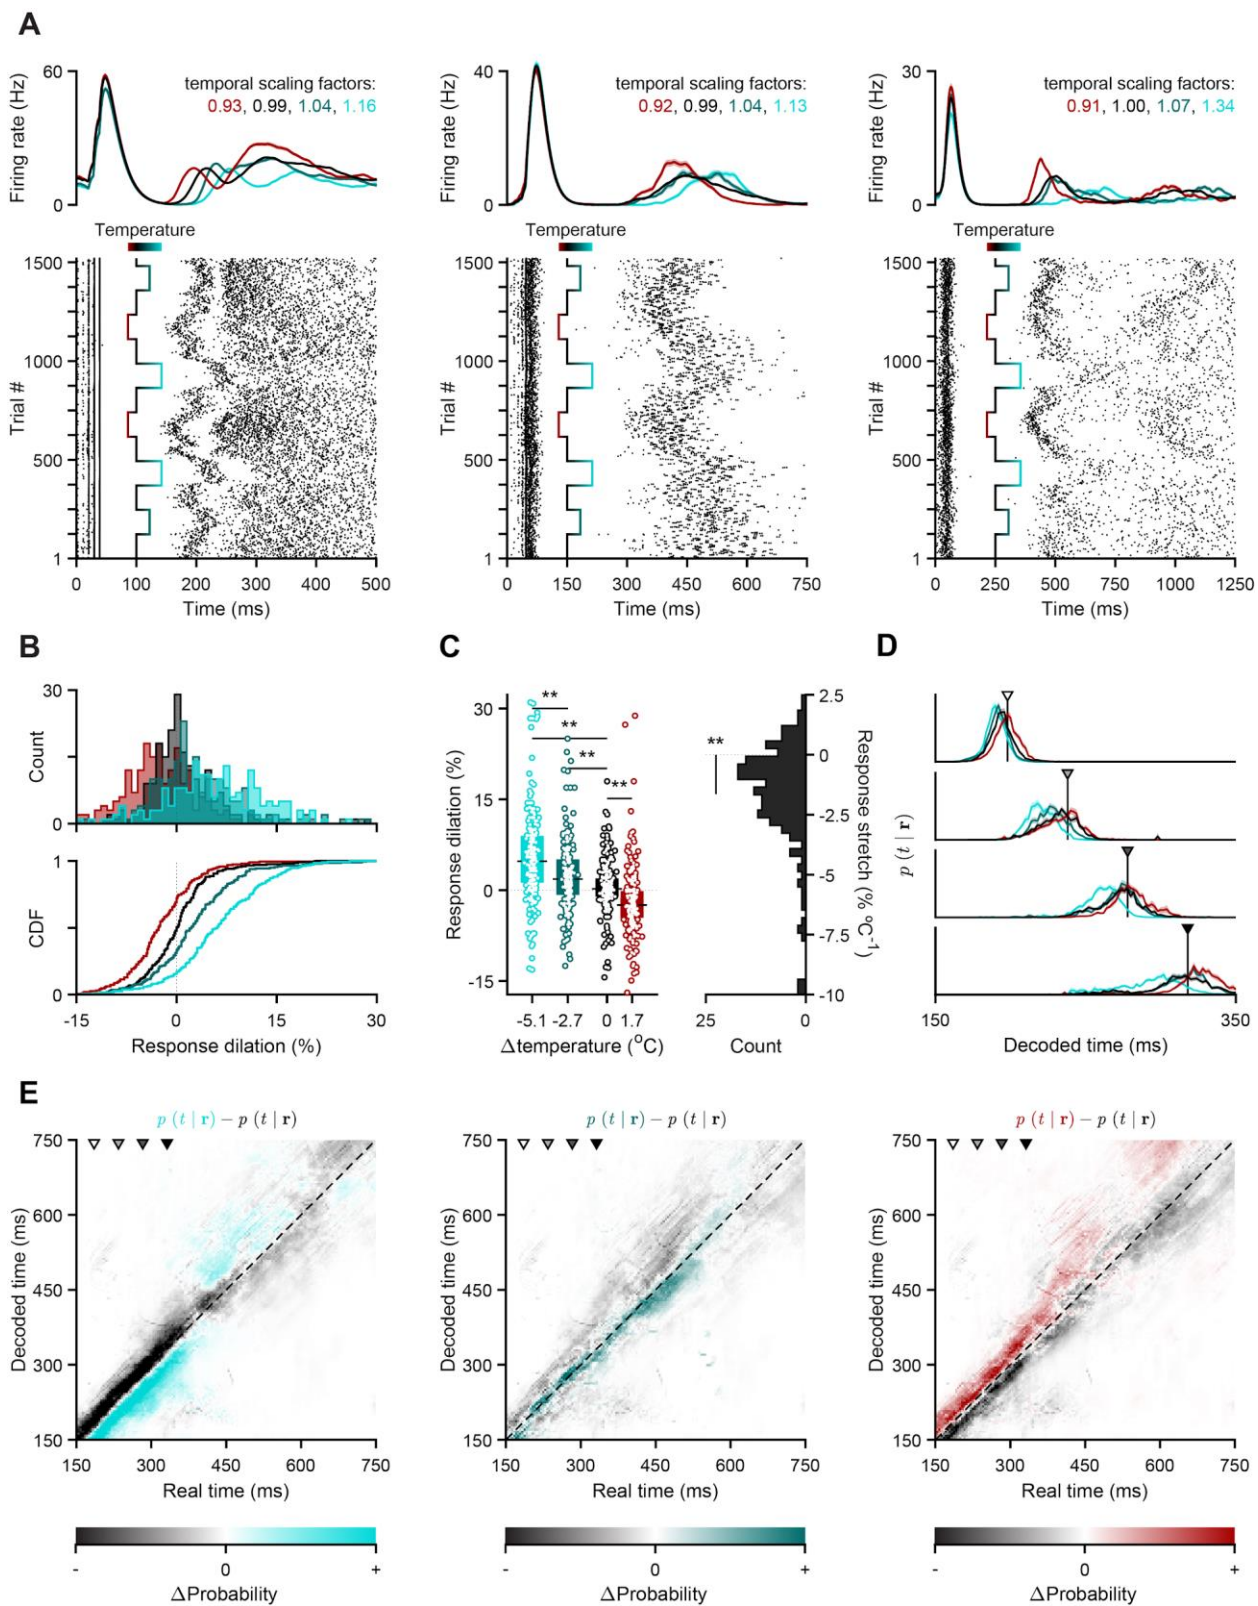



# **Figure 4. Temperature manipulations induced bidirectional and dose-dependent changes in the time course of striatal responses and estimates of duration derived from them.**

**(A)** Activity of three putative striatal units aligned to the onset of VPL stimulation. Top: smoothed PSTHs split by temperature (mean  $\pm$  s.e.m.). Bottom: Raster plots, wherein rows correspond to chronologically ordered trials and each tick mark to a unit-assigned action potential. The superimposed gradient-colored trace indicates how striatal temperature changed over the course of the recording session. **(B)** Distribution of percentage change in temporal scale relative to control (dilation) over all recorded units that survived our intersectional selection criteria (n=251, see methods). Histograms (top) and corresponding cumulative density functions (CDF, bottom) of dilation conditioned on manipulation temperature. Vertical dotted lines indicate a temporal scaling factor of 1 (dilation of 0%). **(C)** Left: Distributions of neuronal response dilations as a function of striatal temperature change. Markers represent temperature-split response dilations for each cell. Boxplots show population medians (horizontal thick black lines) and i.q.r. (colored bars). The thin horizontal dotted line represents a dilation-level of zero. Right: Distribution of stretch in neuronal responses. The thin horizontal dotted line represents a stretch-level of zero. **(D)** Decoded posterior probability of time given the state of concatenated striatal populations at the time points indicated by the arrowheads in (E), averaged separately across trials for each temperature condition (mean  $\pm$  s.e.m.). **(E)** Difference between decoded estimates for manipulation (left: extreme cooling; middle: mild cooling; right: warming) and control conditions, shown for the time window highlighted in **Fig. 3C**. Grayscale arrowheads indicate time points used in panel (D). The identity line is shown in dashed black. Though the color maps for the three different manipulation conditions differ at one end of their color space, their range of values is identical.

# MATERIALS AND METHODS

## Subjects

A total of 26 adult Long-Evans hooded rats (*Rattus norvegicus*) between the ages of 6 and 24 months were used in this study. 2 rats were used in an acute experiment aimed at characterizing the spatiotemporal profile of our temperature manipulation. Another 4 animals were used for an acute experiment combining electrophysiological recordings, temperature manipulation and optogenetic stimulation. 20 wild-type males were trained in the interval discrimination task (or variants thereof), of which 15 were chronically implanted with a custom TEC device that allowed for temperature manipulation experiments, and 5 were used in behavioral manipulation experiments. Prior to surgery, animals were kept in pairs in transparent cages with HEPA (High-Efficiency Particulate Air) filters on a 12-hour light-dark cycle (with lights ON at 8 am), at 21 °C and relative humidity of 50%. All experimental procedures were performed during the light phase of the cycle. Animals used in behavioral experiments had *ad libitum* access to food and were water-deprived. All experimental procedures were in accordance with the European Union Directive 2010/63/EU and approved by the Champalimaud Foundation Animal Welfare Body (Protocol Number: 2017/013) and the Portuguese Veterinary General Board (Direcção-Geral de Veterinária, project approval 0421/000/000/2018).

## Behavioral setup

The behavioral apparatus consisted of a 42 x 30 x 35.5 cm plastic storage box (TROFAST, Ikea) with three floor-level custom nose ports mounted on one of its wider walls, a speaker (LS00532, Pro Signal) nearing the top of the opposite wall and a custom-made lid that provided uniform



lighting and allowed for overhead video recordings (FL3-U3-13S2, FLIR) through an aperture. Each cylinder-shaped nose port was made up of 3D printed components housing a white light emitting diode (LED), an infrared (IR) emitter-sensor pair that enabled the detection of port entries and exits and the accompanying printed circuit board (PCB). Additionally, the two lateral ports (positioned symmetrically around the central one) were each equipped with a metallic spout connected to a 20 mL water syringe via a solenoid valve (LHDA1231215H, Lee Company). All sensors, actuators and peripherals were respectively monitored, controlled and kept in the same temporal reference frame using a custom finite state machine implemented by a microcontroller I/O board (Arduino Mega 2560, Arduino) and an interfacing PCB (Champalimaud Hardware Platform). Finally, detected port events and other task-relevant behavioral data were timestamped, serially communicated to a Windows 10 desktop computer and stored as a parseable text file using a custom python script. High-speed video was acquired at 60 FPS with a resolution of 1280 x 960 pixels in grayscale using Bonsai (60).

## Behavioral training

Leading up to the experimental sessions reported in this paper, animals were first trained in 2 hour-long daily sessions 5 times a week in various “tasks” of increasing complexity. During this stage, which we termed Poking101, rats were progressively introduced to the following rules: (un)lit ports are (un)responsive, meaning that nose-poking into a lit port will cause it to turn off and trigger some task event, whereas doing so at an unlit port is inconsequential; entering a lit lateral port results in a reward delivery of 25 uL of water paired with a brief auditory tone (1750 Hz, 150 ms); entering the central port when it is illuminated initiates a trial and *can* lead to both lateral ports lighting up. This is contingent on the animal’s snout continuing to interrupt the IR beam at the center port for the entirety of a “fixation delay”, which starts off at 0 s and is adaptively marched up towards 3 s (within and across sessions). Critically, these silent delays are

demarcated by two brief auditory tones (7500 Hz, 150 ms), the second of which dependent on the animal's withholding of movement until its arrival. Failure to do so causes the current trial to be aborted, eliciting an error tone (150 ms of white noise) and adding a timeout of 15 s to the already ticking 9-s inter-trial-onset interval (ITOI). This time penalty delays the availability of the next trial, thus reducing obtainable reward rate. Once animals were able to reliably maintain fixation at the central port for 3 s, training on the interval discrimination task began (23). In it, instead of remaining immobile for a fixed amount of time and collecting a reward at either lateral port once it elapsed, rats were asked to fixate for a variable delay on each trial and to then categorize it as either shorter or longer than a boundary of 1.5 s. "Short" judgments were registered at one of the lateral noseports and "long" judgments at the opposite one. Rewards were contingent on stimulus and judgment categories being the same. When this was not the case, an error tone (150 ms of white noise) was played and a time penalty of 10 s was added to the ITOI. Pairs of stimuli symmetric about the categorical boundary were gradually introduced (from easiest to hardest) into the discrete sampling set that animals experienced, until reaching  $I = \{0.6, 1.05, 1.38, 1.62, 1.95, 2.4\}$  s. Though initially a uniform distribution, our final sampling scheme was one in which the more difficult a stimulus was, the more likely it was to be drawn -  $P = \{0.13, 0.17, 0.2, 0.2, 0.17, 0.13\}$ . A correction-loop procedure was used such that, following 3 incorrect categorizations of any given stimulus, only that stimulus was presented to the animal until its associated error count dropped below 3. This training mechanism was disabled during manipulation sessions. It took ~3 months for rats to reach asymptotic performance.

## TEC device

### *Design*

We used a custom-made implantable TEC device (weighing ~30g) based on the Peltier effect to bidirectionally manipulate temperature in the striatum and overlying motor cortex. The implant consisted of a heat dissipation module, a thermoelectric cooling module (01801-9A30-12CN, Custom Thermoelectrics), a 10k $\Omega$  thermistor (9707204, Farnell) and two 15-mm long 1-mm thick sharpened silver probes. These were insulated down to, but excluding, the tips with a thin layer of PTFE low density thread seal tape (00686081520745, Gasoila) and 2-mm wide polyimide tubing (95820-11, Cole-Parmer). The main distinguishing factor between the implant's prototype (used in the single cooling dose pilot experiment, **Fig. S2**) and the final version (used in the bidirectional manipulation cohorts), was that the former was constructed with a passive aluminum heatsink (ICKS25X25X18,5, Fischer Elektronik), whereas the latter had an actively cooled water block (WBA-1.00-0.49-AL-01, Custom Thermoelectrics). This was used in tandem with a peristaltic pump (200-SMA-150-050, Williamson), male and female Luer adapters (WZ-45504-00, Cole-Palmer) and the required interfacing tubing (WZ-06407-71, Cole-Palmer), allowing for a continuous flow (~15 mL/min) of room temperature water through the water block's inner chambers. The TEC module's upper plate was glued to the bottom of the heatsink using thermal glue (TBS20S, TBS), which was also used to secure the thermistor at the center of this module's lower plate. Finally, two insulated and sharpened 1 mm (0.5 mm for the pilot experiment) thick silver probes were soldered on each side of the thermistor using a mixture of lead (419424, Farnell) and silver solder (SDR-9703-030, Custom Thermoelectrics), at a distance of 5 mm from each other. This inter-probe spacing corresponds to two times the ML stereotaxic coordinate of all our TEC implant target locations. Lastly, an RJ45 (85513-5014, Molex) connector was added on top of the water

block and a custom 3D-printed spacer was mounted on its bottom, both secured using epoxy resin (2022-1, Araldite).

### ***Closed-loop control***

The implant was plugged into a custom-made PCB (developed by Champalimaud Hardware Platform and available upon request) via an ethernet cable. This PCB implemented a proportional-integrative-derivative (PID) controller that was designed to bring the implant's thermistor measurement to any experimenter-defined target temperature (within the TEC module's range of operation). Briefly, the thermistor readout was continuously compared to the current temperature setpoint in order to compute an absolute error term (*proportional* channel), a cumulative error (*integrative* channel) and an instantaneous change in error (*derivative* channel). These three error terms were then linearly combined, with weights set by the resistive and capacitive components of the hardware modules that implemented them, and used to modulate the control current driving the TEC device. This negative feedback mechanism was optimized so that the target temperature could be reached with negligible delays, steady-state errors and over/undershoots. The resulting closed loop control allowed for much stabler, safer and more transient temperature manipulations, as it required less user intervention, monitorization and arbitration than its open loop alternatives would. The PID's setpoint was communicated through a serial communication pin from an additional Arduino Mega 2560 board that implemented the temperature manipulation protocol *per se*, meaning it controlled both when to transition into a new block and which temperature to transition to. All block types lasted for 3 minutes (**Fig. 1F**), except for control ones in our single-cooling dose pilot. The latter were twice as long (**Fig. S2**) to accommodate slower heat dissipation due to this initial experiment's characteristic passive heatsink. In all cases, block transition times and target temperatures were respectively signaled via a brief digital pulse and an additional serial communication port to the task-implementing Arduino board. Both the PID-implementing PCB and the block-controlling Arduino were connected to a computer running Windows 10, where a

LabView-based graphical user interface (TEC visualizer, Champalimaud Hardware Platform) enabled online visualization and saving of digitized thermistor temperature measurements (sampled at 100 Hz). Lastly, to prevent irreversible tissue damage in the eventuality of a partial compromise of the closed loop system leading to its “opening”, an additional failsafe mechanism was implemented in the PCB’s firmware, ensuring that the TEC device was automatically disabled if the registered thermistor temperature ever dipped below 0 °C or rose above 55 °C.

## **Calibration**

A calibration curve between different set temperatures at the lower plate of the TEC module and temperature measurements at the tip of the silver probes was derived from an acute preparation with an anesthetized rat (see Acute Temperature Measurements, below). Lower plate temperature was set to each value in  $T = \{5, 15, 20, 25, 30, 45\}$  °C, in blocks of 4 minutes, always preceded and followed by a control block of the same duration ( $T = 36$  °C). Temperature at one of the tips of the implant’s probe was measured by a second thermistor glued along the probe axis to the polyimide insulation layer. In a separate acute experiment, we positioned an angled thermistor probe at different distances to the implant’s tip ( $D = \{0, 600, 6000 \mu\text{m}\}$ ) and for each of them repeated the aforementioned calibration procedure. Post-assembly, all implants were tested individually using the same protocol but in warmed agarose, which has similar thermal properties to brain tissue (61), to ensure their respective TEC modules were functioning steadily and properly calibrated.

## **Surgical procedures**

### **Chronic implants**

Rats ( $n = 15$ ; 5 in the pilot striatal cooling experiment, 6 and 4 in the bidirectional striatal and M1 temperature manipulation experiments, respectively) underwent surgery around 3 months after

they started training. During the implantation of the TEC device rats were anesthetized with 2.0-4.5% isoflurane. Animals' body temperature was continuously monitored and maintained at 35°C by a rectal probe connected to a closed-loop heating system (FHC, <https://www.fh-co.com>). After being anaesthetised and before making the first incision, we administered dexamethasone (2 mg/Kg), carprofen (5 mg/Kg) and a saline solution of atropine (0.05 mg/Kg) subcutaneously. We stereotactically targeted the dorso-central striatum (DCL) bilaterally (+0.84 mm AP,  $\pm 2.5$  mm ML from Bregma, (59)). Two craniotomies and durotomies matching the diameter of the silver probes were made. 5 support screws were placed: 1 in the occipital plate, 2 posterior and 2 anterior to the location of the craniotomies. The cranial bone was covered with self-curing dental adhesive resin cement (Super-Bond, C&B) to improve adherence to the dental acrylic used to secure the implant. The TEC implant was then slowly lowered perpendicular to the brain surface to a depth of 4 mm from cortical surface. The craniotomies were covered with Kwik-Cast (WPI) and the implant was fitted into place and secured with several layers of dental acrylic (the first of which mixed with gentamicin). The procedure ended with suturing (Vicryl, Ethicon Inc.) the skin anterior and posterior to the implant. Animals were allowed to fully recover on a warming pad and returned to the home cage once fully alert. Animals were then individually housed in double decker cages to minimize implant damage. During the 3 days following surgery, animals were injected once a day with carprofen (5 mg/Kg, SC). Animals were allowed to recover for a week after the surgery with food and water *ad libitum*.

### ***Acute temperature measurements***

We used surgical procedures similar to those used for chronic implant placement (see above). Two separate calibration procedures were performed. In one the TEC device had an extra thermistor glued to a probe's polyimide tubing (see **Calibration, TEC device section**, above). In a second calibration experiment, a needle with a thermistor mounted at the tip was lowered at a 30° angle targeting one of the TEC device's tips in DCS, taking temperature measurements at

different distances to the implant's tip (see Calibration above). Immediately following these procedures, animals were perfused for histological confirmation of the measurements' location.

### ***Viral injections***

Following the same procedure used for chronic implantation (see above), we stereotactically targeted the ventral posterolateral nucleus of the thalamus for viral delivery (VPL; -2.3 mm AP,  $\pm 2.8$  mm ML, 6.6 mm DV from Bregma, (59)). We injected 300 nL of rAAV5-CamKII-hChR2(H134R)-EYFP (titer  $\sim 10^{12}$  GC%; University of Pennsylvania Vector Core) using an automated microprocessor controlled microinjection pipette with micropipettes pulled from borosilicate capillaries (Nanoject II, Drummond Scientific). Injections were performed at 0.2 Hz with 2.3 nL injection volumes per pulse. For all injections, the micropipette was kept at the injection site 10 minutes before withdrawal. Craniotomies were then covered with Kwik-Cast (WPI) and the skin was closed with sutures (Vicryl, Ethicon Inc.). Animals were allowed to fully recover on a warming pad and returned to the home cage when fully alert. During the 3 days following surgery, animals were given carprofen (5 mg/Kg, SC).

### ***Acute recordings and stimulation***

Following 3-6 weeks for viral expression, 4 rats were anesthetized with two doses of urethane, the first at 0.7 g/Kg of body weight and the second at 0.35 g/Kg 20 minutes after. Additionally, we administered dexamethasone (2 mg/Kg), carprofen (5 mg/Kg) and a saline solution of atropine (0.05 mg/Kg) subcutaneously. Following this, animals were kept with isoflurane at 0.5-1% until at least 30 minutes before electrophysiological recordings were to begin. Animals' body temperature was continuously monitored and maintained at 35°C by a rectal probe connected to a closed-loop heating system (FHC, <https://www.fh-co.com>) throughout the experiments. We opened a large rectangular craniotomy over the left hemisphere (4 mm AP by 3 mm ML from Bregma), centered in the same target location as the chronic implants (see above). A 300  $\mu$ m diameter and 0.37NA optic fiber (Doric) was targeted to VPL (-2.3 mm AP,  $\pm 2.8$  mm ML, 6.2 mm DV from Bregma, (59)),

inserted at a 39° angle and secured with blue light cured self adhesive resin cement (RelyX™ Unicem 2 Self-Adhesive Resin Cement, 3M). A small silver ground wire was inserted under the skull of the opposite hemisphere. A TEC device similar to the one used for chronic implants (with a single silver probe at a 90° angle relative to the heat sink, to accommodate the geometrical demands of the experimental preparation) was lowered to the same DCS target location (+0.84 mm AP, -2.5 mm ML, 4 mm DV from Bregma). This modified device was calibrated and behaved similarly to the ones used for chronic manipulations. Finally, a Neuropixels probe (Phase 3A Option 3, IMEC, (37)) was placed caudally relative to the temperature probe (**Fig. 3A, Fig. S1**), and slowly lowered to target (5 to 6.5 mm DV) and allowed to stabilize in the tissue for at least 30 minutes before starting recordings and stimulation protocols. Isoflurane was turned off at least 30 minutes before starting recording and stimulation protocols. Seldomly, and for longer recording protocols, an additional dose of urethane was necessary to maintain anesthesia (0.2 g/Kg). An 473 nm LED source (Doric) was connected to the implanted optical fiber using a patch cord (400 µm core, 0.48 NA) and set to 3.5-5.5 mW at the end of the fiber and controlled using a dedicated arduino that was also responsible for switching the block temperature identity through a serial communication with the TEC controller. Each stimulation trial consisted of a single train of 5, 1- ms long, pulses at 100 Hz. Each trial was separated by a period 1.5 seconds. Electrophysiological and peripheral synchronization (LED and temperature probe) data were simultaneously acquired using SpikeGLX software (<https://billkarsh.github.io/SpikeGLX/>) at 30kHz. Local-field potential gain and action potential gain were set at 250 and 500, respectively, and split at 300 Hz. Identically to behavior manipulations (see **Temperature manipulation protocol**, below), each block at a specific temperature lasted 3 minutes. Temperature identities were drawn, without replacement, from the available set of 3 temperatures and were always intercalated with a control block. This protocol was repeated twice for a total of 2 blocks of each manipulated condition. Immediately following these procedures, animals were perfused for histological confirmation of the measurements' location.



## Temperature manipulation protocol

After one week of recovery from surgery, all animals were again water deprived. After reaching similar pre-surgery performance in the interval timing task described above, behavioral sessions were divided in 3-minute fixed-time blocks: control blocks, in which the implant was set to body temperature ( $\sim 36^\circ\text{C}$ ), that were interleaved with different block-wise randomized manipulation doses (15, 25 and  $42^\circ\text{C}$ ). Each session always started and ended with a control block and animals were not cued to block transitions. Manipulation sessions were interleaved with washout sessions, in which both the temperature controller of the implant was disabled, and correction-loop training was reinstated (see **Behavioral Training** above).

## Implant placement confirmation

Rats were sacrificed with transcardiac perfusion with phosphate-buffered saline (PBS), followed by 4% (wt/vol) paraformaldehyde (PFA). Following perfusion, brains were left in 4% PFA for 24 h and then moved to a 30% sucrose solution (wt/vol) in PBS for 2 to 3 days. For animals who performed the behavioral manipulation sessions, a 1 T MR scanner (ICON, Bruker) was used to collect MRI data. A  $T_2$ -weighted structural image of the brains was collected using a Rapid Imaging with Refocused Echoes (RARE) pulse sequence. The sequence used had a repetition time of 2800 ms, echo time of 90 ms and a RARE factor of 12. The field of view was set to  $28 \times 15 \times 20 \text{ mm}^2$ , the spatial resolution of the images was  $150 \times 150 \times 150 \mu\text{m}^3$  or  $80 \times 80 \times 80 \mu\text{m}^3$  and a matrix of  $187 \times 100 \times 133$  voxels was acquired after 8 averages during a 7 hour scanning. For the pilot and acute experiments, a vibratome was used to section the brain into  $50 \mu\text{m}$  coronal or  $40 \mu\text{m}$  sagittal slices, respectively. Coronal slices were stained with NISSL and sagittal slices series were alternated with NISSL or immunostained with a primary antibody against GFP (A-6455, Invitrogen) and a secondary antibody conjugated with AlexaFluor 488 (ab150077), and

finally, incubated in DAPI. Images were acquired with a stereoscope (Lumar V12, Zeiss) or a slide scanner (Axio Scan Z1, Zeiss).

## Behavioral data analysis

All behavioral data were analyzed using custom MATLAB (<https://www.mathworks.com>) scripts unless otherwise stated.

### *Preprocessing*

Trials with reaction times greater than 500 ms, or movement times greater than 3 s were labelled as outliers and excluded from all reported analyses. This resulted in less than 5% of all trials being removed. In order to make balanced comparisons across animals and temperature conditions, data from the initial two manipulation sessions of every chronically implanted animal were pooled together chronologically up to the point where there were 10 trials per stimulus for each manipulation condition and 40 trials per stimulus for the control temperature condition. The same pooling procedure was applied in reverse for the last two temperature and boundary manipulation sessions shown in **Fig. S6**. All reaction and movement time analyses were performed on medians calculated using only data from correct categorizations of the shortest interval in our stimulus set, for the reasons laid out in **Fig. S4**.

### *Psychometric function*

We used the *Psignifit* (62) toolbox to fit the following 4-parameter psychometric function to all interval discrimination data:

$$\psi(x; m, w(\alpha), \lambda, \gamma) = \gamma + (1 - \lambda - \gamma) \times S(x; m, w(\alpha))$$

$$S_{logistic}(x; m, w(\alpha)) = \frac{1}{1 + \exp^{-2\ln(1/\alpha - 1) \times (x - m)/w}}, \alpha = 0.05$$

In this parameterization, a strictly monotonic sigmoid function  $S$  from the stimulus level  $x$  onto the unit interval  $[0,1]$ , is specified by  $m = S^{-1}(0.5)$  and  $w = S^{-1}(1 - 0.05) - S^{-1}(0.05)$ , namely the *threshold* and *width* parameters. This is independent of the choice of  $S$ , which in our case is the logistic function. The hyper-parameter  $\alpha$ , which sets the span of  $w$  along the  $y$  axis, was set to 0.05. To account for stimulus-independent choices,  $S$  is scaled by two additional free parameters,  $\lambda$  and  $\gamma$ , which respectively control the upper and lower asymptotes of the psychometric function  $\Psi$ . The  $\lambda$  and  $\gamma$  parameters were fixed across temperatures at values found through fitting the corresponding control temperature data.

### ***Dilation & stretch metrics***

We adopted the dilation and stretch definitions of Long and Fee (27). Briefly, *dilation* ( $D$ ) of any scalar metric  $x$  (be it threshold M.A.P., median reaction or movement time), was calculated as the percent difference from unity in the ratio of a given temperature estimate over that of control.

$$D = \left( \frac{x_{\Delta T}}{x_{\Delta T=0}} - 1 \right) \times 100$$

*Stretch* ( $S$ ) was defined as the slope coefficient in a least squares linear regression using dilation as the response variable and the magnitude of our temperature manipulation (induced temperature differences around the implant's tip, **Fig. 1E, F**) as the sole predictor.

$$D = S \times \Delta T + \beta_0 + \epsilon$$

## Electrophysiological data analysis

### *Preprocessing*

We used a semi-automated offline approach to detect and sort recorded action potentials into well-isolated units and clusters of multi-unit activity. Detection, sorting and inference of the relative depth of each unit, were done using KiloSort2 ([github.com/MouseLand/Kilosort2](https://github.com/MouseLand/Kilosort2)), whereas curation of the resulting clusters was performed using Phy ([github.com/cortex-lab/phy](https://github.com/cortex-lab/phy)). Prior to any of the analyses shown in the main figures, we further selected validated neuronal units with an intersectional approach that used firing rate, stability, recording depth (**Fig. S1**) and stimulation-modulation as criteria. Briefly, in order to survive this selection step, units had to: have a mean firing rate outside of the VPL stimulation period (**Fig. 3C**) of 0.25 Hz or higher; be “stable” throughout the recording session, which we enforced by discarding units for which the Pearson correlation coefficient between average spike density functions computed with two random non-overlapping permutations of control trials was lower than a 0.75 threshold; have been recorded at a contact that was later inferred to be in the striatum, by comparing its position along the Neuropixels probe to a dip in the distribution of recorded cell depths (**Fig. S1**), likely corresponding to a characteristic silence when transitioning from gray (cortex) to white (corpus callosum) to gray (striatum) matter.

### *Single neuron responses*

Spike density functions were built on a trial-by-trial basis by first counting spike times in 2-ms bins and then convolving the resulting histogram with a causal kernel specified by a gamma distribution with shape and scale parameters of  $k = 2$  and  $\theta = 7.5$  ms, respectively. To compute temporal scaling factors for each unit-condition pair, we first upsampled control spike density functions by a factor of 10 and then warped them in time using 1000 scale factors, linearly spaced in the range

[0.625, 1.75]. Both the upsampling and time-warping steps were performed using linear interpolation. Next, we linearly regressed all time-warped templates against the spike density function of each temperature condition and stored the corresponding coefficient of determination ( $R^2$ ). The scale factor that maximized this template-matching metric, is what we operationally defined as the *temporal scaling factor* for that unit and experimental condition (**Fig. S5**). In the case of control scaling factors, we again split data into two random non-overlapping sets of trials and arbitrated which one was used to construct templates and which one was the target. Regarding response dilation and stretch, we used the same definitions from the behavioral analysis section (see above), except that scaling factors ( $f$ ) replaced ratios of temperature over control estimates when calculating dilation:

$$D = (f - 1) \times 100$$

### ***Decoding time from ongoing population activity***

We used a Naïve Bayes decoder with a flat prior to continuously compute probability distributions over elapsed time using multi-session, stimulation-aligned concatenations of putative striatal population activity.

Briefly, we:

- 1) Discretized time  $t$  into  $B$  2-ms long bins, such that  $b \in [1, B]$  and  $t_b \in [0, 1500]$ ms;
- 2) Fit an encoding model to each neuron  $n \in [1, N]$  at each point in true time  $t_b$ :

$$p(r_n | t_b)$$

Which we determined empirically by querying cell-specific single-trial spike density functions  $r_n$  at the true time interval  $[t_b, t_{b+1}]$ , and smoothing the resulting rate histograms with a gaussian kernel ( $\mu = 0$ ,  $\sigma = 10$ Hz). This was done using a subset of trials making up half of all trials recorded during control blocks;

- 3) Made conditional independence assumptions about neurons, regardless of whether or not they were simultaneously recorded:

$$p(t_b | R) \propto \prod_{n=1}^N p(r_n | t_b)$$

Where  $R = (r_1, r_2, \dots, r_N)$  is a novel, to-be-decoded instance of concatenated population activity recorded at a known temperature condition and point in true time since VPL stimulation;

- 4) Used Bayes' rule in creating a decoding model that linearly combined all individual neuron encoding models with a uniform prior over decoded time  $p(t_b) = \frac{1}{B}$ :

$$p(t_b | R) = \frac{p(t_b) \prod_{n=1}^N p(r_n | t_b)}{p(R)}$$

Where the probability  $p(R)$  for the population vector  $R$  to occur does not have to be estimated explicitly, as it indirectly follows from normalizing the posterior distribution  $p(t_b | R)$  such that it sums to 1 over all possible decoder outcomes, i.e., elapsed time as decoded from striatal ongoing activity.

Once the time-dependence in the responses of striatal cells recorded during a set of training trials is known, this Bayesian approach directly addresses the inverse problem: given the firing rates of the same cells, now recorded during previously unseen test trials, how likely is it for any and all  $b$  units of time to have passed since the last train of light pulses was delivered to VPL?

## Statistics

Unless otherwise stated, we used one-sample two-tailed t-tests whenever assessing the statistical significance of shifts in distributions, which we visually afford with vertical solid black

lines connecting the distribution's mean to zero. When examining differences across distributions, we used either two-sample two-tailed t-tests when comparing striatal and motor-cortical stretch distributions, or repeated measures ANOVA followed by post-hoc contrasts with Tukey correction for multiple comparisons when comparing experimental dilation distributions within cohorts. We visually afford these two- and paired-sample tests with horizontal solid black lines connecting the two underlying distributions, offset in y for clarity. In all cases, we denote test outcomes close-by the respective visual affordance with the following notation: \*,  $p < 0.05$ ; \*\*,  $p < 0.01$ ; n.s., not significant. In the case of single animal stretch estimates (**Fig. 2C, D**), we assessed their statistical significance at a 5% level by bootstrapping M.A.P. estimates for thresholds, and medians for reaction and movement times. Specifically, we computed these point estimates for 1000 random samples per manipulation condition, constructed by sampling equal numbers of trials with replacement from the control condition while preserving stimulus identity. For each iteration, we then performed a linear regression on bootstrapped dilations and stored the respective slope coefficient as that iteration's stretch. Bootstrapped significance was consistently denoted by larger dark-filled markers, as opposed to smaller white ones.

# SUPPLEMENTARY FIGURES

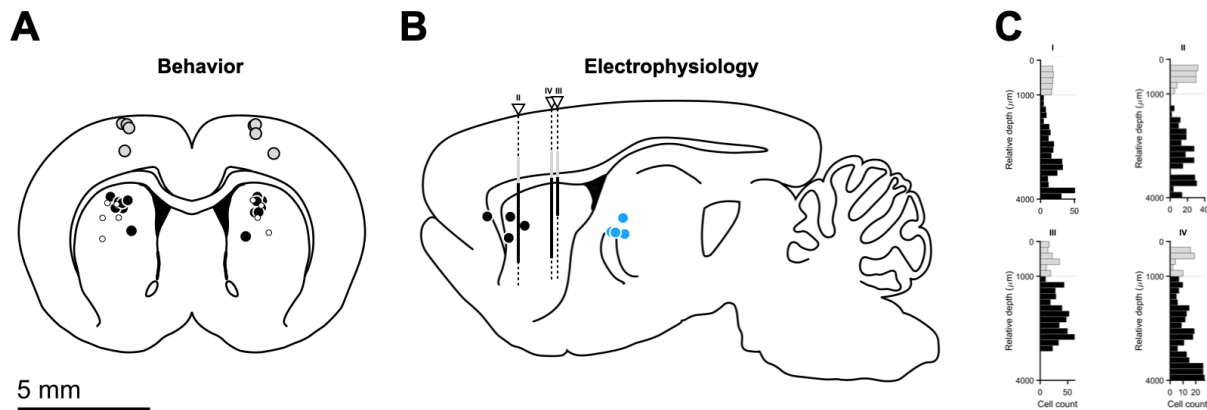

**Figure S1. Histological reconstruction of thermoelectric cooling (TEC) devices, optical fibers and Neuropixels placements for chronic and acute experiments.**

(A) Intermediate anterior posterior (AP) location of TEC device probes projected onto target coronal slice (AP = +0.84 mm from Bregma) for striatal (black markers, n = 6) and cortical (gray markers, n = 4) targets. White markers show implant locations for the pilot striatal cooling experiment (n = 5). (B) Intermediate medial-lateral (ML) locations of TEC device probes (black markers), optical fibers (blue markers) and Neuropixels probes (white triangles) projected onto a reference sagittal slice (ML = 2.62 mm from Bregma). (C) Distributions of relative recording depths for all animals (n = 4) and recorded units (n = 535 across animals). Horizontal dashed line represents corpus callosum. Putative motor cortical and striatal neurons in gray and black, respectively. Histograms' relative depth is overlaid in (B) using the same color scheme. We were unable to clearly identify the Neuropixels tract for animal I. Brain slices were adapted from (59).



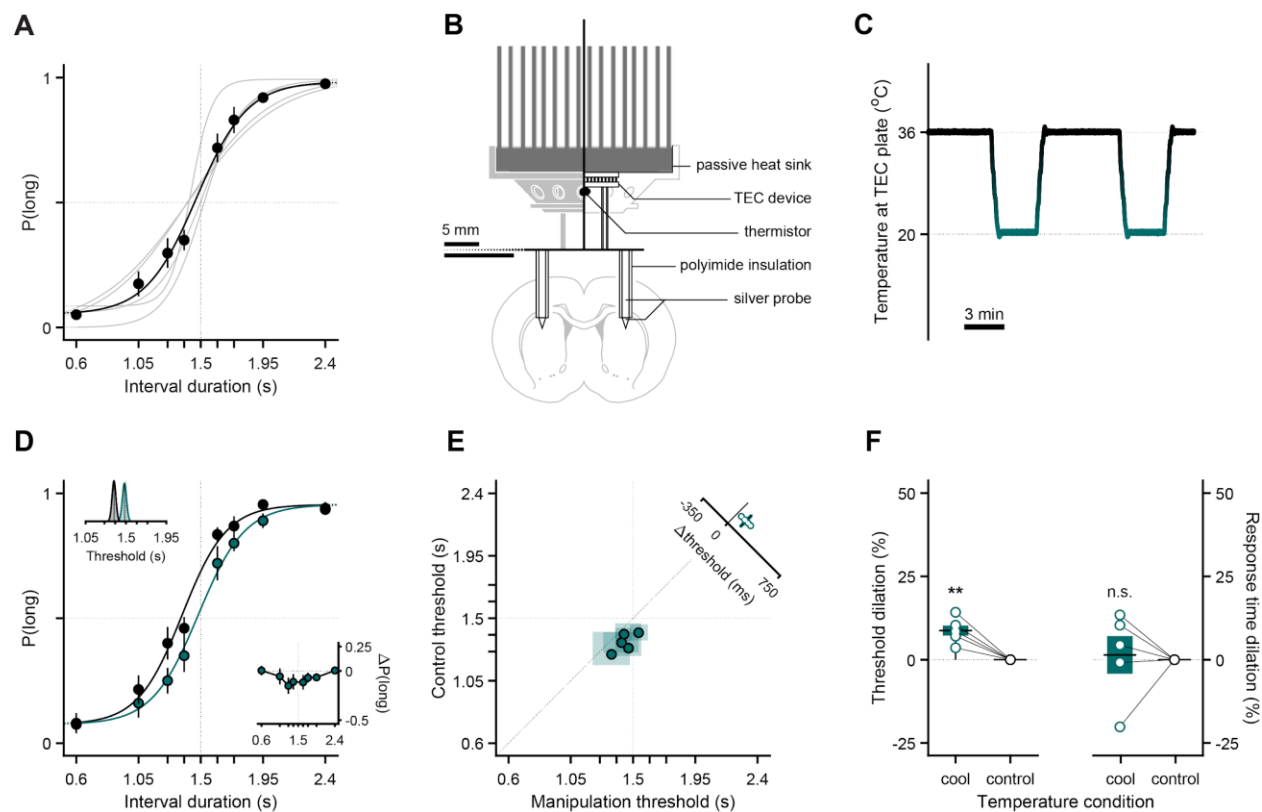

**Figure S2. A TEC device capable of a single mild cooling temperature produced qualitatively similar effects on timing judgments.**

(A) Discrimination performance of all animals implanted with the prototype of our TEC device ( $n = 5$ ) on the day of training that preceded the first cooling session. Gray lines are psychometric fits to individual animals. The solid black line is a fit to the average across animals. Markers correspond to mean data across the pilot striatal cohort (mean  $\pm$  s.e.m.). The thin dotted vertical (horizontal) line represents the categorical boundary (chance-level performance). (B) Schematic of the prototype of our implantable TEC device. The thick horizontal black line splits the diagram into 2 differently scaled subregions (see 5 mm scale bars). (C) Representative segment of a session's thermistor readout illustrating the temperature manipulation protocol employed in pilot, single-cooling dose experiments. (D) Average discrimination performance at the onset of cooling

for the pilot cohort. Main axes: psychometric functions fit to cross-animal averages of temperature-split psychophysical data, respectively shown as solid lines and markers of matching color (mean  $\pm$  s.e.m.). The thin dotted vertical (horizontal) line represents the categorical boundary (chance-level performance). Bottom-right inset: Average differences in proportion of long choices from the cooling condition to control (mean  $\pm$  propagated s.e.m.). The thin dotted vertical (horizontal) line represents the categorical boundary (zero-level). Top-left inset: Marginal posterior distributions of the threshold parameter for the control and cooling psychometric fits. Solid black lines represent the M.A.P. point estimates implicit in the fits shown in the main axes. The thin dotted vertical line represents the categorical boundary. **(E)** Markers represent M.A.P. estimates and transparent patches the corresponding 95% confidence intervals of threshold parameters fit to performance of individual animals on control (y axis) versus cooling blocks (x axis). Each animal contributes with one data point. The thin dotted vertical and horizontal lines represent the categorical boundary. The identity line is plotted as a diagonal line. Inset: Distribution of threshold differences between the cooling and control conditions. Markers represent individual animal differences, bar and error bars are the mean and s.e.m. across animals, respectively. **(F)** Overall effect of striatal single dose temperature manipulations on psychophysical threshold and response times (**Fig. 1A**). Left: Distribution of percentage change in threshold relative to control (dilation) as a function of induced temperature change. Markers represent individual threshold dilations, linked within animals by thin solid black lines. Right: Same for response time medians instead of threshold point estimates. Boxplots show animal means (horizontal thick black lines) and s.e.m. (colored bars). Markers represent individual animals, and their size and color denote bootstrapped significance.

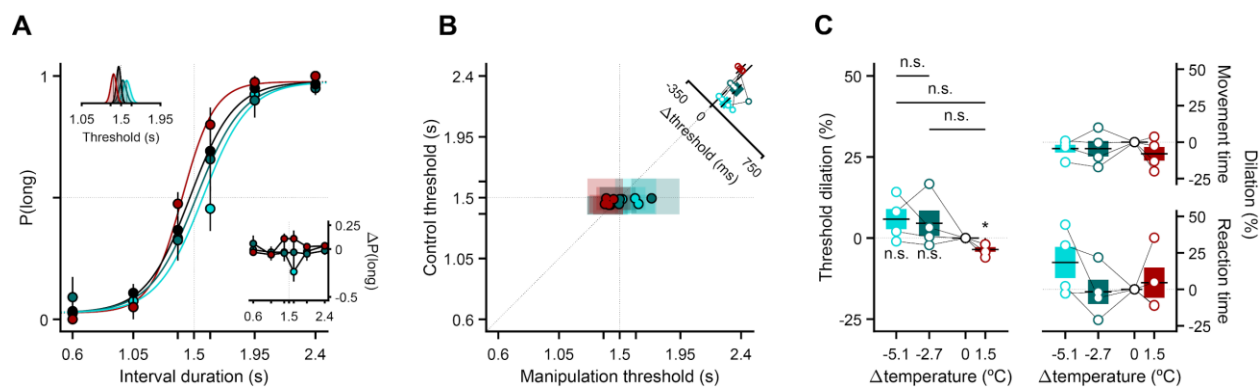

**Figure S3. Manipulating the temperature of M1 cortex produced markedly smaller effects on timing judgments**

(A) Average discrimination performance at the onset of M1 temperature manipulations. Main axes: psychometric functions fit to cross-animal averages ( $n = 4$ ) of temperature-split psychophysical data, respectively shown as solid lines and markers of matching color (mean  $\pm$  s.e.m.). The thin dotted vertical (horizontal) line represents the categorical boundary (chance-level performance). Bottom-right inset: Average differences in proportion of long choices from each manipulation condition to control (mean  $\pm$  propagated s.e.m.). The thin dotted vertical (horizontal) line represents the categorical boundary (zero-level). Top-left inset: Marginal posterior distributions of the threshold parameter for each condition's psychometric fit. Solid black lines represent the M.A.P. point estimates implicit in the fits shown in the main axes. The thin dotted vertical line represents the categorical boundary. (B) Animal-split discrimination behavior at the onset of M1 temperature manipulations. Main axes: Markers represent M.A.P. estimates and transparent patches the corresponding 95% confidence intervals of threshold parameters fit to individual animals' performance on control (y axis) versus manipulation blocks (x axis). The thin dotted vertical and horizontal lines represent the categorical boundary. The identity line is plotted as a diagonal line. Inset: Distribution of threshold differences between manipulation and control conditions. Markers represent individual animal differences, bars and error bars are animal

1068 means and s.e.m. **(C)** Effect of motor cortical temperature manipulations on psychophysical  
 1069 threshold (left), reaction (bottom right) and movement times (top right). Markers represent  
 1070 individual metric dilations, linked within animals by thin solid black lines. Boxplots show animal  
 1071 means (horizontal thick black lines) and s.e.m. (colored bars).

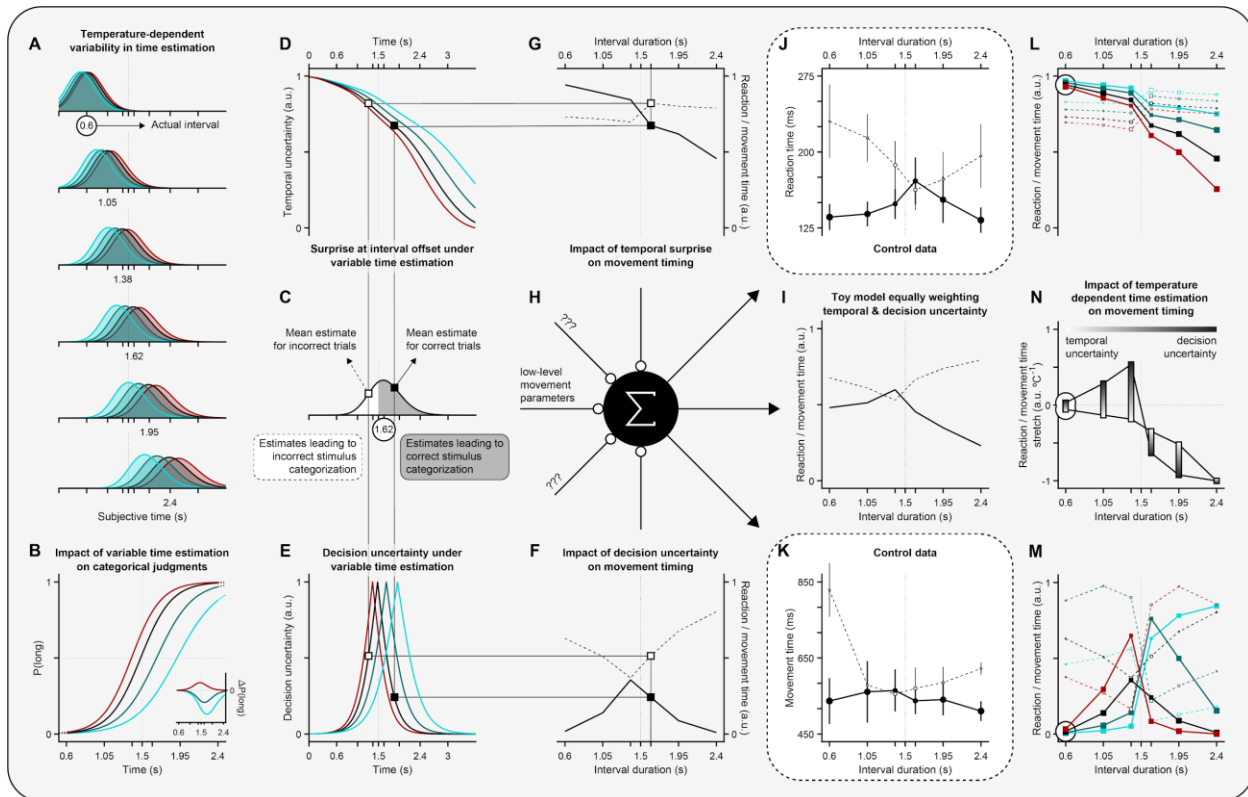

**Figure S4. The effects of temperature on temporal and decision uncertainty are expected to modulate reaction and movement times, but minimally in trials where the shortest interval was presented.**

(A) Schematic depiction of distributions of internal time estimates over trials for different temperatures (colors) and different interval stimuli (rows). (B) Impact of temperature on categorical duration judgments assuming time estimate distributions in panel (A). Inset depicts the difference in the probability of a long choice between each of the temperature manipulation conditions and the control temperature condition. (C) Example distribution of internal time estimates at the offset of the 1.62 s interval stimulus during control “trials”, with the portion of estimates categorized as “long” in gray, and “short” in white. Square markers indicate the mean internal time estimate for correct trials in black, and incorrect trials in white. (D) Expected effect

of temperature dependent variability in time estimation on temporal surprise, computed as the complement of the hazard rate for interval offset. **(E)** Expected impact of temperature dependent variability in time estimation on decision uncertainty, proportional to the complement of the expected probability of correctly categorizing a given interval. Vertical lines connecting panels (C), (D), and (E) provide a visual index of the average internal time estimates at the offset of the 1.62 s interval (C) on correct (black marker) and incorrect (white marker) trials into the corresponding average temporal and decision uncertainty levels for those trials during the control temperature condition. Horizontal lines from (E) to (F) provide a visual index from decision uncertainty on these same trials into its expected impact on movement timing **(34) (F)**, and horizontal lines from panel (D) to panel (G) provide a visual index from temporal surprise on these same trials into expected impact of temporal surprise on movement timing **(35, 36) (G)**. Solid lines in (F) and (G) correspond to correct trials, and dashed lines to incorrect trials. These influences on movement timing combine with other possible influences **(H)**, such as low level postural factors, to produce the overall profile of movement timing as function of interval for the two choices. A toy example fully explained by equal parts temporal and decision uncertainty is shown in **(I)**. **(J, K)** Data from the control condition of the 6 rats who underwent multiple striatal temperature conditions (shown in **Fig. 2**), depicting average reaction **(J)** and movement times **(K)** split by stimulus and choice (mean  $\pm$  s.e.m.). The rightmost column of the figure depicts the expected impact of temperature dependent variability in time estimation on the timing of movement across different temperatures, separately for the contributions of temporal surprise at interval offset **(L)**, and the influence of decision uncertainty **(M)**. **(N)** Influence of timing variability on the *stretch* (see methods) of reaction or movement times as a function of interval and depending on the relative weighting of temporal surprise and decision uncertainty in determining movement timing. Timing variability would be expected to minimally affect motor timing through non-motor processes such as temporal expectation and decision uncertainty for the shortest interval in the set. We thus tested the hypothesis that temperature affected timing of low-level

1110 motor processes by examining motor timing in those trials where the shortest interval was  
1111 presented.

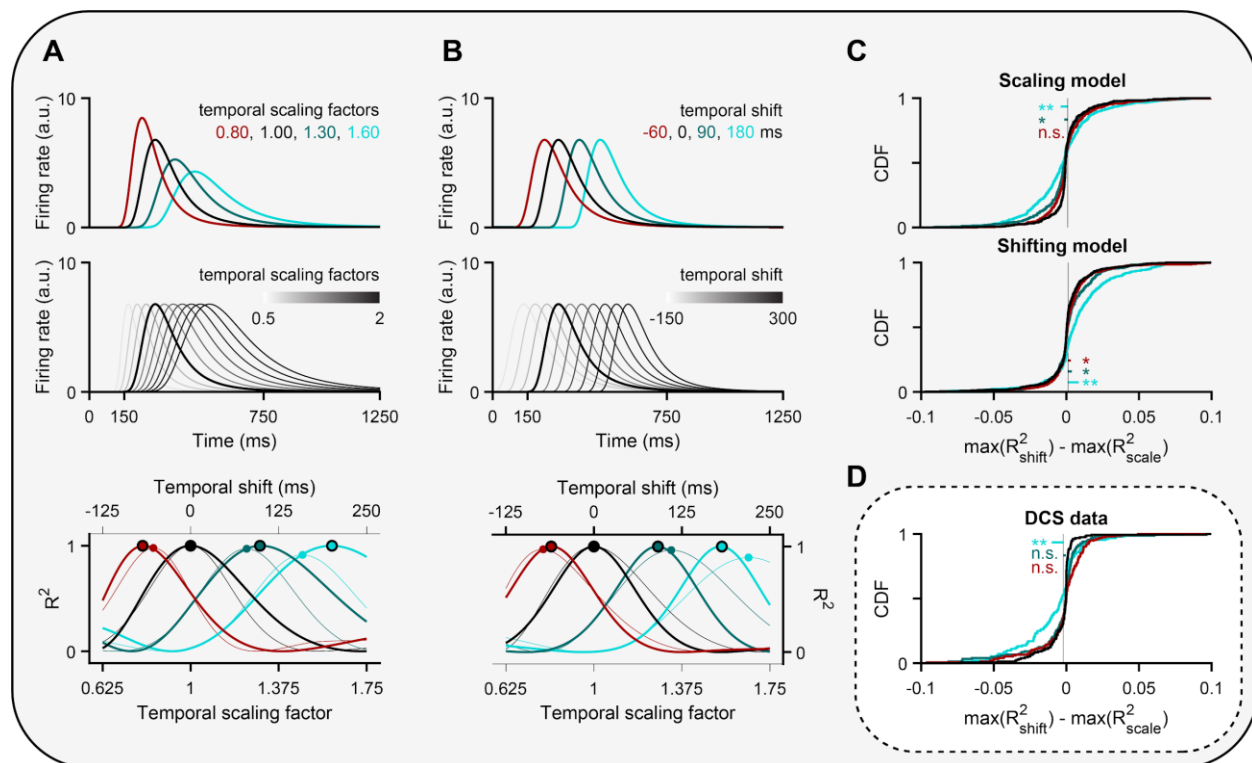

**Figure S5. Temporal scaling as opposed to shifting provided a better account of temperature's effect on neural activity.**

(A) Top: Simulated spike density functions exhibiting bidirectional and dose-dependent temporal scaling with temperature. Middle: Templates built by warping a control spike density function (thicker black line) in time by scale factors ranging from 0.625 (maximum contraction) to 1.75 (maximum dilation). Note that when applying this method to data, this control response is not the same as the one shown in the top panel, as the two are built using two non-overlapping random sets of control trials (see methods). Bottom: Thick lines represent the coefficient of determination ( $R^2$ ) for all scaled templates in the middle panel regressed against each of the target spike density functions shown at the top. We computed this objective function for each neuron-temperature condition pair and took its global maximum as the corresponding temporal scaling factor, highlighted here by the larger markers. Thinner lines and smaller markers depict  $R^2$  values for a



similar regression procedure applied to a series of shifted, as opposed to scaled, templates (see B). **(B)** Same as (A), except that for artificially temporally shifted responses relative to control (top), temporally shifted templates (middle), and their regression outcomes (bottom). The thinner lines and smaller markers respectively represent the  $R^2$  curves and maxima resultant from regressing the scaled templates from A, middle against the shifted targets in B, top. Conversely, the result of regressing shifted templates against scaled targets is plotted in the same manner in (A, bottom). **(C)** To assess whether the effects of temperature on individual striatal responses were better accounted for by temporal scaling or shifting, we built two separate spiking models in which we either injected one effect or the other. Briefly, we modeled 500 control firing rate functions as gaussian bumps defined over 1.5 s with means spanning the interval from 150 ms to 750 ms (**Fig. 3C**) and a standard deviation of 50 ms. The amplitudes of the resulting probability density functions were rescaled so that their distribution of mean firing rates matched that of striatal data. Next, we created one additional rate function per neuron per manipulation condition by either shifting or scaling its control response in time. Again, the distribution of generative temporal scaling factors and shifts used was informed by the empirical distributions of these metrics extracted from striatal data. We then generated 150 spike trains of each condition per neuron by sampling spike times from inhomogeneous Poisson point processes with the aforementioned condition-specific responses as their time-dependent rate parameters. From this point on, we proceeded to analyze the resulting spike “data” in the exact same way we did for the striatal data, by first averaging trials within condition, generating libraries of templates and then computing temporal scaling factors and shifts. Finally, for each “neuron”-condition pair within each model, we stored the  $R^2$  values corresponding to the best-matching scaled and shifted templates and subtracted the former from the latter to build the distributions shown here at the top (scaling model) and middle (shifting model) panels. Thick solid sigmoidal lines represent the CDFs of each condition’s  $R^2$  difference. Thin vertical black lines denote control mean differences. Small horizontal colored lines link the respective means of the corresponding manipulation and control

1151 distributions. **(D)** Same as (C), but for striatal data.

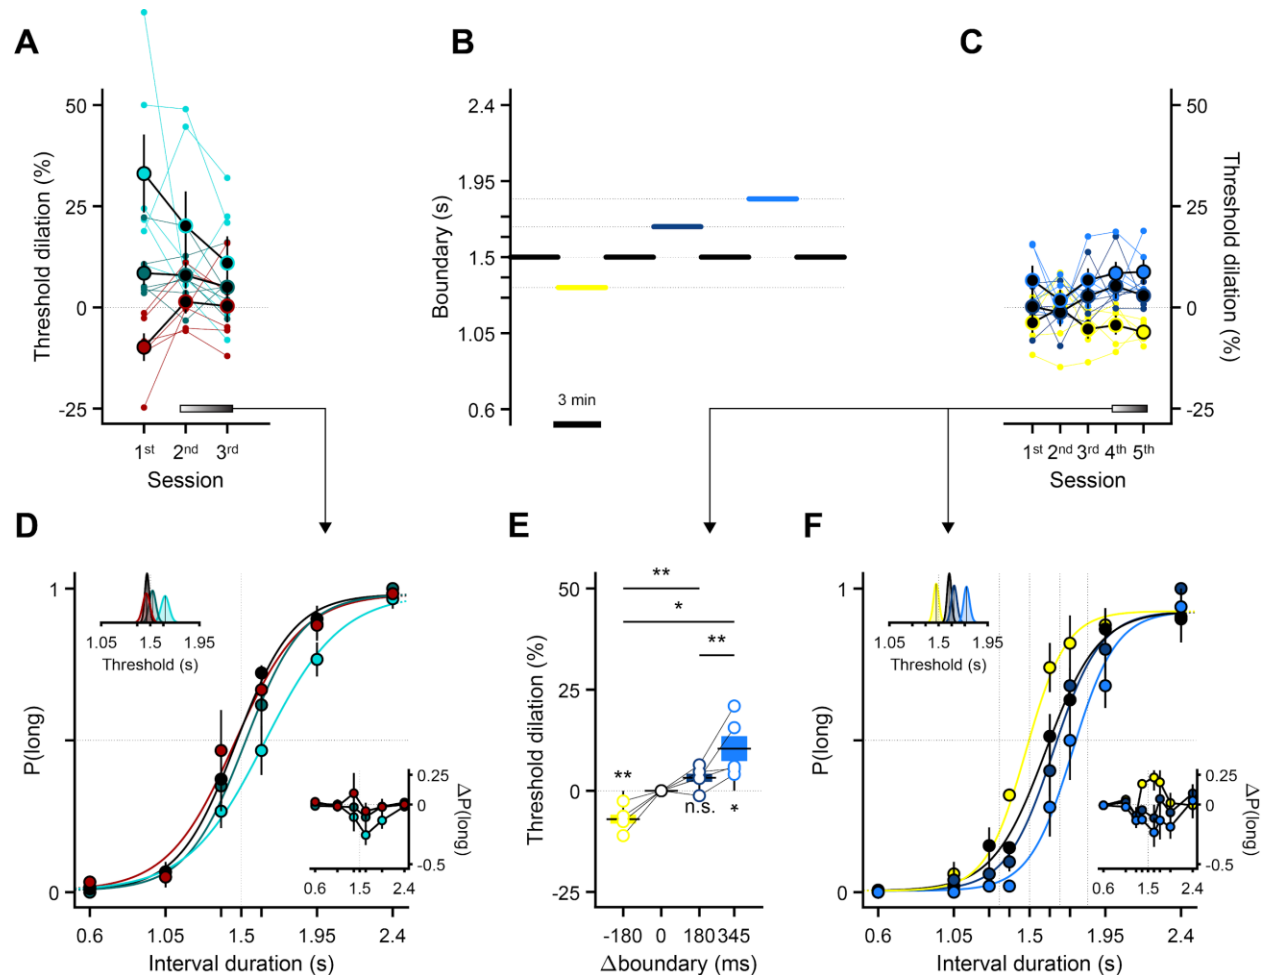

**Figure S6. Animals adapted their behavior to both temperature and category boundary manipulations.**

(A) Threshold dilation across the first three temperature manipulation sessions for the striatal cohort shown in **Fig. 2** (n = 6). Small markers and thin lines linking them refer to threshold dilations for individual animals. Larger markers correspond to cross-animal averages (mean ± s.e.m.), and their facecolor being any other than black indicates that the underlying dilation distribution was significantly shifted from zero (p<0.05, one-sample two-tailed t-test). The gradient bar and arrow

1161 symbolize the uneven contribution of the last two sessions to the data pool shown in (D), with the  
 1162 last session contributing the most (see methods). **(B)** Time-course of the boundary manipulation  
 1163 experiment. The thin horizontal dotted lines represent the four categorical boundaries animals  
 1164 experienced in these sessions (i.e., boundary changes followed the same rules as the  
 1165 temperature manipulation experiments: a control-manipulation-control 3-min block design with  
 1166 boundaries drawn at random and without replacement from the set  $B = \{1.32, 1.5, 1.68, 1.85\}$  s  
 1167 until exhaustion, at which point the set was replenished and the sampling process resumed). The  
 1168 color scheme introduced in this panel is preserved throughout the figure. **(C)** Same as (A), but for  
 1169 the first five boundary manipulation sessions ( $n = 5$  rats). **(D)** Average discrimination performance  
 1170 on the last and second to last sessions of striatal temperature manipulations (see methods). Main  
 1171 axes: psychometric functions fit to cross-animal averages of temperature-split psychophysical  
 1172 data, respectively shown as solid lines and markers of matching color (mean  $\pm$  s.e.m.). The thin  
 1173 dotted vertical (horizontal) line represents the categorical boundary (chance-level performance).  
 1174 Bottom-right inset: Average differences in proportion of long choices from each manipulation  
 1175 condition to control (mean  $\pm$  propagated s.e.m.). The thin dotted vertical (horizontal) line  
 1176 represents the categorical boundary (zero-level). Top-left inset: Marginal posterior distributions of  
 1177 the threshold parameter for each condition's psychometric fit. Solid black lines represent the  
 1178 M.A.P. point estimates implicit in the fits shown in the main axes. The thin dotted vertical line  
 1179 represents the categorical boundary. **(E)** Distributions of percentage change in threshold relative  
 1180 to control (dilation) as a function of which categorical boundary was enforced. Markers represent  
 1181 individual threshold dilations, linked within animals by thin solid black lines. **(F)** Same as (D), but  
 1182 for the last two days of boundary manipulations, with all boundaries in our manipulation set as  
 1183 dotted vertical dashed lines.

# REFERENCES

60. G. Lopes, N. Bonacchi, J. Frazão, J. P. Neto, B. V. Atallah, S. Soares, L. Moreira, S. Matias, P. M. Itskov, P. A. Correia, R. E. Medina, L. Calcaterra, E. Dreosti, J. J. Paton, A. R. Kampff, Bonsai: an event-based framework for processing and controlling data streams. *Front. Neuroinform.* **9**, 7 (2015).
61. S. Kim, P. Tathireddy, R. A. Normann, F. Solzbacher, Thermal impact of an active 3-D microelectrode array implanted in the brain. *IEEE Trans. Neural Syst. Rehabil. Eng.* **15**, 493–501 (2007).
62. H. Schütt, S. Harmeling, J. Macke, F. Wichmann, Psignifit 4: Pain-free Bayesian Inference for Psychometric Functions. *Journal of Vision.* **15** (2015), p. 474.
